# Supplementary material for: HFOApp: A MATLAB Graphical User Interface for High-Frequency Oscillation Marking
Source: eNeuro. 2021 Oct 8;8(5):ENEURO.0509-20.2021. doi: 10.1523/ENEURO.0509-20.2021 (PMC8503963; doi:10.1523/ENEURO.0509-20.2021)
Supplement: Extended Data 1 — HFO App Package V1. Download Extended Data 1, ZIP file. [file enu-eN-MNT-0509-20-s02.zip]

Archive with 210 entries (177 files):
- HFOApp_Package_V1/
- HFOApp_Package_V1/.DS_Store
- __MACOSX/
- __MACOSX/HFOApp_Package_V1/
- __MACOSX/HFOApp_Package_V1/._.DS_Store
- HFOApp_Package_V1/GUIs/
- HFOApp_Package_V1/GUIs/TimeApp.mlapp
- HFOApp_Package_V1/GUIs/.DS_Store
- __MACOSX/HFOApp_Package_V1/GUIs/
- __MACOSX/HFOApp_Package_V1/GUIs/._.DS_Store
- HFOApp_Package_V1/GUIs/ConfigYScale.mlapp
- HFOApp_Package_V1/GUIs/ConfigSpectrogram.mlapp
- HFOApp_Package_V1/GUIs/FreqApp.mlapp
- HFOApp_Package_V1/GUIs/ConfigAutoDetector.mlapp
- HFOApp_Package_V1/GUIs/ConfigOptions.mlapp
- HFOApp_Package_V1/GUIs/ConfigWindows.mlapp
- HFOApp_Package_V1/GUIs/ConfigFilter.mlapp
- HFOApp_Package_V1/GUIs/ConfigMontage.mlapp
- HFOApp_Package_V1/Example_data/
- HFOApp_Package_V1/Example_data/.DS_Store
- __MACOSX/HFOApp_Package_V1/Example_data/
- __MACOSX/HFOApp_Package_V1/Example_data/._.DS_Store
- HFOApp_Package_V1/Example_data/HFOEvents_example_data_st_summary.txt
- __MACOSX/HFOApp_Package_V1/Example_data/._HFOEvents_example_data_st_summary.txt
- HFOApp_Package_V1/Example_data/example_data_st.mat
- HFOApp_Package_V1/Example_data/HFOEvents_example_data_st.mat
- __MACOSX/HFOApp_Package_V1/Example_data/._HFOEvents_example_data_st.mat
- HFOApp_Package_V1/Example_data/HFOEvents_example_data_st.txt
- __MACOSX/HFOApp_Package_V1/Example_data/._HFOEvents_example_data_st.txt
- HFOApp_Package_V1/SimulatedDatasets/
- HFOApp_Package_V1/SimulatedDatasets/ripplelab_hil_cfg.mat
- HFOApp_Package_V1/SimulatedDatasets/hfoapp_mni_cfg.mat
- HFOApp_Package_V1/SimulatedDatasets/hfoapp_ste_cfg.mat
- HFOApp_Package_V1/SimulatedDatasets/HFOApp_SimulateData.m
- __MACOSX/HFOApp_Package_V1/SimulatedDatasets/
- __MACOSX/HFOApp_Package_V1/SimulatedDatasets/._HFOApp_SimulateData.m
- HFOApp_Package_V1/SimulatedDatasets/HFOApp_SimulatedData.py
- __MACOSX/HFOApp_Package_V1/SimulatedDatasets/._HFOApp_SimulatedData.py
- HFOApp_Package_V1/SimulatedDatasets/hfoapp_sll_cfg.mat
- HFOApp_Package_V1/SimulatedDatasets/hfoapp_hil_cfg.mat
- HFOApp_Package_V1/HFOApp.mlapp
- HFOApp_Package_V1/Functions/
- HFOApp_Package_V1/Functions/.DS_Store
- __MACOSX/HFOApp_Package_V1/Functions/
- __MACOSX/HFOApp_Package_V1/Functions/._.DS_Store
- HFOApp_Package_V1/Functions/HFOAutoDetectorHil.m
- __MACOSX/HFOApp_Package_V1/Functions/._HFOAutoDetectorHil.m
- HFOApp_Package_V1/Functions/HFOAutoDetectorMNI.m
- __MACOSX/HFOApp_Package_V1/Functions/._HFOAutoDetectorMNI.m
- HFOApp_Package_V1/Functions/HFOLoadData.m
- __MACOSX/HFOApp_Package_V1/Functions/._HFOLoadData.m
- HFOApp_Package_V1/Functions/HFOSpectrogram.m
- __MACOSX/HFOApp_Package_V1/Functions/._HFOSpectrogram.m
- HFOApp_Package_V1/Functions/HFOAutoDetect.m
- __MACOSX/HFOApp_Package_V1/Functions/._HFOAutoDetect.m
- HFOApp_Package_V1/Functions/HFOFiltData.m
- __MACOSX/HFOApp_Package_V1/Functions/._HFOFiltData.m
- HFOApp_Package_V1/Functions/HFOApp_ExampleUsage.m
- __MACOSX/HFOApp_Package_V1/Functions/._HFOApp_ExampleUsage.m
- HFOApp_Package_V1/Functions/HFOAppDefaultConfig.m
- __MACOSX/HFOApp_Package_V1/Functions/._HFOAppDefaultConfig.m
- HFOApp_Package_V1/Functions/HFOAutoDetectorSTE.m
- __MACOSX/HFOApp_Package_V1/Functions/._HFOAutoDetectorSTE.m
- HFOApp_Package_V1/Functions/EstimateNbcycles.m
- __MACOSX/HFOApp_Package_V1/Functions/._EstimateNbcycles.m
- HFOApp_Package_V1/Functions/HFOAutoDetectorSLL.m
- __MACOSX/HFOApp_Package_V1/Functions/._HFOAutoDetectorSLL.m
- HFOApp_Package_V1/External/
- HFOApp_Package_V1/External/.DS_Store
- __MACOSX/HFOApp_Package_V1/External/
- __MACOSX/HFOApp_Package_V1/External/._.DS_Store
- HFOApp_Package_V1/External/freetb4matlab/
- HFOApp_Package_V1/External/freetb4matlab/statistics/
- HFOApp_Package_V1/External/freetb4matlab/statistics/fb_gamcdf.m
- __MACOSX/HFOApp_Package_V1/External/freetb4matlab/
- __MACOSX/HFOApp_Package_V1/External/freetb4matlab/statistics/
- __MACOSX/HFOApp_Package_V1/External/freetb4matlab/statistics/._fb_gamcdf.m
- HFOApp_Package_V1/External/freetb4matlab/statistics/discrete_cdf.m
- __MACOSX/HFOApp_Package_V1/External/freetb4matlab/statistics/._discrete_cdf.m
- HFOApp_Package_V1/External/freetb4matlab/statistics/fb_gamlike.m
- __MACOSX/HFOApp_Package_V1/External/freetb4matlab/statistics/._fb_gamlike.m
- HFOApp_Package_V1/External/freetb4matlab/statistics/fb_gampdf.m
- __MACOSX/HFOApp_Package_V1/External/freetb4matlab/statistics/._fb_gampdf.m
- HFOApp_Package_V1/External/freetb4matlab/statistics/nmsmax.m
- __MACOSX/HFOApp_Package_V1/External/freetb4matlab/statistics/._nmsmax.m
- HFOApp_Package_V1/External/freetb4matlab/statistics/empirical_cdf.m
- __MACOSX/HFOApp_Package_V1/External/freetb4matlab/statistics/._empirical_cdf.m
- HFOApp_Package_V1/External/freetb4matlab/statistics/fb_gamfit.m
- __MACOSX/HFOApp_Package_V1/External/freetb4matlab/statistics/._fb_gamfit.m
- __MACOSX/HFOApp_Package_V1/External/freetb4matlab/._statistics
- HFOApp_Package_V1/External/freetb4matlab/README.FREETB4MATLAB
- __MACOSX/HFOApp_Package_V1/External/freetb4matlab/._README.FREETB4MATLAB
- HFOApp_Package_V1/External/freetb4matlab/.DS_Store
- __MACOSX/HFOApp_Package_V1/External/freetb4matlab/._.DS_Store
- HFOApp_Package_V1/External/freetb4matlab/AUTHORS
- __MACOSX/HFOApp_Package_V1/External/freetb4matlab/._AUTHORS
- HFOApp_Package_V1/External/freetb4matlab/general/
- HFOApp_Package_V1/External/freetb4matlab/general/fb_postpad.m
- __MACOSX/HFOApp_Package_V1/External/freetb4matlab/general/
- __MACOSX/HFOApp_Package_V1/External/freetb4matlab/general/._fb_postpad.m
- HFOApp_Package_V1/External/freetb4matlab/general/fb_interp1.m
- __MACOSX/HFOApp_Package_V1/External/freetb4matlab/general/._fb_interp1.m
- __MACOSX/HFOApp_Package_V1/External/freetb4matlab/._general
- HFOApp_Package_V1/External/freetb4matlab/COPYING.BSD
- __MACOSX/HFOApp_Package_V1/External/freetb4matlab/._COPYING.BSD
- HFOApp_Package_V1/External/freetb4matlab/COPYING.GPL
- __MACOSX/HFOApp_Package_V1/External/freetb4matlab/._COPYING.GPL
- HFOApp_Package_V1/External/freetb4matlab/COPYING
- __MACOSX/HFOApp_Package_V1/External/freetb4matlab/._COPYING
- HFOApp_Package_V1/External/freetb4matlab/VERSION
- __MACOSX/HFOApp_Package_V1/External/freetb4matlab/._VERSION
- HFOApp_Package_V1/External/freetb4matlab/signal/
- HFOApp_Package_V1/External/freetb4matlab/signal/fb_bilinear.m
- __MACOSX/HFOApp_Package_V1/External/freetb4matlab/signal/
- __MACOSX/HFOApp_Package_V1/External/freetb4matlab/signal/._fb_bilinear.m
- HFOApp_Package_V1/External/freetb4matlab/signal/fb_sftrans.m
- __MACOSX/HFOApp_Package_V1/External/freetb4matlab/signal/._fb_sftrans.m
- HFOApp_Package_V1/External/freetb4matlab/signal/fb_cheby2.m
- __MACOSX/HFOApp_Package_V1/External/freetb4matlab/signal/._fb_cheby2.m
- HFOApp_Package_V1/External/freetb4matlab/signal/fb_cplxreal.m
- __MACOSX/HFOApp_Package_V1/External/freetb4matlab/signal/._fb_cplxreal.m
- HFOApp_Package_V1/External/freetb4matlab/signal/fb_hamming.m
- __MACOSX/HFOApp_Package_V1/External/freetb4matlab/signal/._fb_hamming.m
- HFOApp_Package_V1/External/freetb4matlab/signal/fd_filtfilt.m
- __MACOSX/HFOApp_Package_V1/External/freetb4matlab/signal/._fd_filtfilt.m
- HFOApp_Package_V1/External/freetb4matlab/signal/fb_cheb2ord.m
- __MACOSX/HFOApp_Package_V1/External/freetb4matlab/signal/._fb_cheb2ord.m
- HFOApp_Package_V1/External/freetb4matlab/signal/fb_fir2.m
- __MACOSX/HFOApp_Package_V1/External/freetb4matlab/signal/._fb_fir2.m
- HFOApp_Package_V1/External/freetb4matlab/signal/fb_fir1.m
- __MACOSX/HFOApp_Package_V1/External/freetb4matlab/signal/._fb_fir1.m
- __MACOSX/HFOApp_Package_V1/External/freetb4matlab/._signal
- __MACOSX/HFOApp_Package_V1/External/._freetb4matlab
- HFOApp_Package_V1/External/wafo/
- HFOApp_Package_V1/External/wafo/Statistics/
- HFOApp_Package_V1/External/wafo/Statistics/edfcnd.m
- __MACOSX/HFOApp_Package_V1/External/wafo/
- __MACOSX/HFOApp_Package_V1/External/wafo/Statistics/
- __MACOSX/HFOApp_Package_V1/External/wafo/Statistics/._edfcnd.m
- __MACOSX/HFOApp_Package_V1/External/wafo/._Statistics
- HFOApp_Package_V1/External/wafo/misc/
- HFOApp_Package_V1/External/wafo/misc/parseoptions.m
- __MACOSX/HFOApp_Package_V1/External/wafo/misc/
- __MACOSX/HFOApp_Package_V1/External/wafo/misc/._parseoptions.m
- __MACOSX/HFOApp_Package_V1/External/wafo/._misc
- HFOApp_Package_V1/External/wafo/COPYRIGHTS
- __MACOSX/HFOApp_Package_V1/External/wafo/._COPYRIGHTS
- HFOApp_Package_V1/External/wafo/.DS_Store
- __MACOSX/HFOApp_Package_V1/External/wafo/._.DS_Store
- HFOApp_Package_V1/External/wafo/@wdata/
- HFOApp_Package_V1/External/wafo/@wdata/setsamplinginfo.m
- __MACOSX/HFOApp_Package_V1/External/wafo/@wdata/
- __MACOSX/HFOApp_Package_V1/External/wafo/@wdata/._setsamplinginfo.m
- __MACOSX/HFOApp_Package_V1/External/wafo/._@wdata
- HFOApp_Package_V1/External/wafo/COPYING.LESSER
- __MACOSX/HFOApp_Package_V1/External/wafo/._COPYING.LESSER
- HFOApp_Package_V1/External/wafo/COPYING
- __MACOSX/HFOApp_Package_V1/External/wafo/._COPYING
- HFOApp_Package_V1/External/wafo/wafolicence.m
- __MACOSX/HFOApp_Package_V1/External/wafo/._wafolicence.m
- HFOApp_Package_V1/External/wafo/createwdata.m
- __MACOSX/HFOApp_Package_V1/External/wafo/._createwdata.m
- __MACOSX/HFOApp_Package_V1/External/._wafo
- HFOApp_Package_V1/External/fieldtrip/
- HFOApp_Package_V1/External/fieldtrip/fir_df.m
- HFOApp_Package_V1/External/fieldtrip/ft_notification.m
- HFOApp_Package_V1/External/fieldtrip/ft_warning.m
- HFOApp_Package_V1/External/fieldtrip/filter_with_correction.m
- HFOApp_Package_V1/External/fieldtrip/ft_preproc_bandpassfilter.m
- HFOApp_Package_V1/External/fieldtrip/ft_preproc_bandstopfilter.m
- HFOApp_Package_V1/External/fieldtrip/bilinear.m
- HFOApp_Package_V1/External/fieldtrip/.DS_Store
- __MACOSX/HFOApp_Package_V1/External/fieldtrip/
- __MACOSX/HFOApp_Package_V1/External/fieldtrip/._.DS_Store
- HFOApp_Package_V1/External/fieldtrip/in_fopen_micromed.m
- HFOApp_Package_V1/External/fieldtrip/butter.m
- HFOApp_Package_V1/External/fieldtrip/defaultId.m
- HFOApp_Package_V1/External/fieldtrip/hilbert.m
- HFOApp_Package_V1/External/fieldtrip/minphaserceps.m
- HFOApp_Package_V1/External/fieldtrip/invfirwsord.m
- HFOApp_Package_V1/External/fieldtrip/ft_error.m
- HFOApp_Package_V1/External/fieldtrip/filtfilt.m
- HFOApp_Package_V1/External/fieldtrip/db_template.m
- HFOApp_Package_V1/External/fieldtrip/read_micromed_trc.m
- HFOApp_Package_V1/External/fieldtrip/ft_platform_supports.m
- HFOApp_Package_V1/External/fieldtrip/fopen_or_error.m
- HFOApp_Package_V1/External/fieldtrip/ft_info.m
- HFOApp_Package_V1/External/fieldtrip/fir_filterdcpadded.m
- HFOApp_Package_V1/External/fieldtrip/kaiserbeta.m
- HFOApp_Package_V1/External/fieldtrip/postpad.m
- HFOApp_Package_V1/External/fieldtrip/firws.m
- HFOApp_Package_V1/External/fieldtrip/firwsord.m
- HFOApp_Package_V1/External/fieldtrip/nearest.m
- HFOApp_Package_V1/External/fieldtrip/plotfresp.m
- HFOApp_Package_V1/External/fieldtrip/windows.m
- HFOApp_Package_V1/External/fieldtrip/read_edf.m
- __MACOSX/HFOApp_Package_V1/External/fieldtrip/._read_edf.m
- HFOApp_Package_V1/External/fieldtrip/istrue.m
- HFOApp_Package_V1/External/fieldtrip/bst_fileparts.m
- HFOApp_Package_V1/External/fieldtrip/sftrans.m
- HFOApp_Package_V1/External/ripplelab/
- HFOApp_Package_V1/External/ripplelab/f_EqualizerFreqFilter.m
- __MACOSX/HFOApp_Package_V1/External/ripplelab/
- __MACOSX/HFOApp_Package_V1/External/ripplelab/._f_EqualizerFreqFilter.m
- HFOApp_Package_V1/External/ripplelab/f_FFT.m
- __MACOSX/HFOApp_Package_V1/External/ripplelab/._f_FFT.m
- HFOApp_Package_V1/License.txt
- __MACOSX/HFOApp_Package_V1/._License.txt
- HFOApp_Package_V1/HFOApp_Manual.pdf
- __MACOSX/HFOApp_Package_V1/._HFOApp_Manual.pdf
