# Supplementary material for: HFOApp: A MATLAB Graphical User Interface for High-Frequency Oscillation Marking
Source: eNeuro. 2021 Oct 8;8(5):ENEURO.0509-20.2021. doi: 10.1523/ENEURO.0509-20.2021 (PMC8503963; doi:10.1523/ENEURO.0509-20.2021)
Supplement: Extended Data 1 — HFO App Package V1. Download Extended Data 1, ZIP file. [file enu-eN-MNT-0509-20-s02.zip › HFOApp_Package_V1/Example_data/HFOEvents_example_data_st.txt]

File created by HFOApp. DO NOT EDIT.
Number of header lines:  11
Number of trials: 1
Data file: ~/HFOAPP/example_data/example_data_st.mat
Time: 2020-10-13 00:00:00 - 2020-10-13 00:03:00
Total number of channels: 3
Length of data: 180.0005 s
Sampling rate: 2048 Hz
Onset threshold: 3; Inclusion threshold: 5; Number of cycles: 3.
----------------------------------------------------------------------------------------------------
Trial, Channel, EventLocation(sample),  EventType, AverageFreq(Hz), PeakZscore, NoCycles,       BPFreq
    1,   a6 a1,        302076  302164,     ripple,          110.70,       9.53,     4.81,   80.0  250.0
    1,   a6 a1,        330878  330926,     ripple,          128.00,      12.38,     3.06,   80.0  250.0
    1,   a6 a1,        339943  339999,     ripple,          122.88,      11.38,     3.42,   80.0  250.0
    1,   a2 a1,        300952  301005,     ripple,          117.03,       6.40,     3.09,   80.0  250.0
    1,   a2 a1,        302075  302145,     ripple,          113.78,       9.38,     3.94,   80.0  250.0
    1,   a2 a1,        330876  330926,     ripple,          124.12,      12.09,     3.09,   80.0  250.0
