# Supplementary material for: HFOApp: A MATLAB Graphical User Interface for High-Frequency Oscillation Marking
Source: eNeuro. 2021 Oct 8;8(5):ENEURO.0509-20.2021. doi: 10.1523/ENEURO.0509-20.2021 (PMC8503963; doi:10.1523/ENEURO.0509-20.2021)
Supplement: Extended Data 1 — HFO App Package V1. Download Extended Data 1, ZIP file. [file enu-eN-MNT-0509-20-s02.zip › HFOApp_Package_V1/Example_data/HFOEvents_example_data_st_summary.txt]

File created by HFOApp. DO NOT EDIT.
Number of header lines:  11
Number of trials: 1
Data file: ~/HFOAPP/example_data/example_data_st.mat
Time: 2020-10-13 00:00:00 - 2020-10-13 00:03:00
Total number of channels: 3
Length of data: 180.0005 s
Sampling rate: 2048 Hz
Onset threshold: 3; Inclusion threshold: 5; Number of cycles: 3.
----------------------------------------------------------------------------------------------------
NoTrial, Channel, GammaDur(s), RippleDur(s), FastrippleDur(s), UltrafastDur(s), SpikeDur(s), GammaNo, RippleNo, FastrippleNo, UltrafastNo, SpikeNo
      1,   a6 a1,       0.000,        0.094,            0.000,           0.000,       0.000,       0,        3,            0,           0,       0
      1,   a2 a1,       0.000,        0.084,            0.000,           0.000,       0.000,       0,        3,            0,           0,       0
