# Supplementary material for: HFOApp: A MATLAB Graphical User Interface for High-Frequency Oscillation Marking
Source: eNeuro. 2021 Oct 8;8(5):ENEURO.0509-20.2021. doi: 10.1523/ENEURO.0509-20.2021 (PMC8503963; doi:10.1523/ENEURO.0509-20.2021)
Supplement: Extended Data 1 — HFO App Package V1. Download Extended Data 1, ZIP file. [file enu-eN-MNT-0509-20-s02.zip › HFOApp_Package_V1/External/fieldtrip/bilinear.m]

% Copyright (C) 1999 Paul Kienzle
%
% This program is free software; you can redistribute it and/or modify
% it under the terms of the GNU General Public License as published by
% the Free Software Foundation; either version 2 of the License, or
% (at your option) any later version.
%
% This program is distributed in the hope that it will be useful,
% but WITHOUT ANY WARRANTY; without even the implied warranty of
% MERCHANTABILITY or FITNESS FOR A PARTICULAR PURPOSE.  See the
% GNU General Public License for more details.
%
% You should have received a copy of the GNU General Public License
% along with this program; If not, see <http://www.gnu.org/licenses/>.

% usage: [Zz, Zp, Zg] = bilinear(Sz, Sp, Sg, T)
%        [Zb, Za] = bilinear(Sb, Sa, T)
%
% Transform a s-plane filter specification into a z-plane
% specification. Filters can be specified in either zero-pole-gain or
% transfer function form. The input form does not have to match the
% output form. 1/T is the sampling frequency represented in the z plane.
%
% Note: this differs from the bilinear function in the signal processing
% toolbox, which uses 1/T rather than T.
%
% Theory: Given a piecewise flat filter design, you can transform it
% from the s-plane to the z-plane while maintaining the band edges by
% means of the bilinear transform.  This maps the left hand side of the
% s-plane into the interior of the unit circle.  The mapping is highly
% non-linear, so you must design your filter with band edges in the
% s-plane positioned at 2/T tan(w*T/2) so that they will be positioned
% at w after the bilinear transform is complete.
%
% The following table summarizes the transformation:
%
% +---------------+-----------------------+----------------------+
% | Transform     | Zero at x             | Pole at x            |
% |    H(S)       |   H(S) = S-x          |    H(S)=1/(S-x)      |
% +---------------+-----------------------+----------------------+
% |       2 z-1   | zero: (2+xT)/(2-xT)   | zero: -1             |
% |  S -> - ---   | pole: -1              | pole: (2+xT)/(2-xT)  |
% |       T z+1   | gain: (2-xT)/T        | gain: (2-xT)/T       |
% +---------------+-----------------------+----------------------+
%
% With tedious algebra, you can derive the above formulae yourself by
% substituting the transform for S into H(S)=S-x for a zero at x or
% H(S)=1/(S-x) for a pole at x, and converting the result into the
% form:
%
%    H(Z)=g prod(Z-Xi)/prod(Z-Xj)
%
% Please note that a pole and a zero at the same place exactly cancel.
% This is significant since the bilinear transform creates numerous
% extra poles and zeros, most of which cancel. Those which do not
% cancel have a 'fill-in' effect, extending the shorter of the sets to
% have the same number of as the longer of the sets of poles and zeros
% (or at least split the difference in the case of the band pass
% filter). There may be other opportunistic cancellations but I will
% not check for them.
%
% Also note that any pole on the unit circle or beyond will result in
% an unstable filter.  Because of cancellation, this will only happen
% if the number of poles is smaller than the number of zeros.  The
% analytic design methods all yield more poles than zeros, so this will
% not be a problem.
%
% References:
%
% Proakis & Manolakis (1992). Digital Signal Processing. New York:
% Macmillan Publishing Company.

% Author: Paul Kienzle <pkienzle@users.sf.net>

function [Zz, Zp, Zg] = bilinear(Sz, Sp, Sg, T)

if nargin==3
  T = Sg;
  [Sz, Sp, Sg] = tf2zp(Sz, Sp);
elseif nargin~=4
  usage('[Zz, Zp, Zg]=bilinear(Sz,Sp,Sg,T) or [Zb, Za]=blinear(Sb,Sa,T)');
end;

p = length(Sp);
z = length(Sz);
if z > p || p==0
  error('bilinear: must have at least as many poles as zeros in s-plane');
end

% ----------------  -------------------------  ------------------------
% Bilinear          zero: (2+xT)/(2-xT)        pole: (2+xT)/(2-xT)
%      2 z-1        pole: -1                   zero: -1
% S -> - ---        gain: (2-xT)/T             gain: (2-xT)/T
%      T z+1
% ----------------  -------------------------  ------------------------
Zg = real(Sg * prod((2-Sz*T)/T) / prod((2-Sp*T)/T));
Zp = (2+Sp*T)./(2-Sp*T);
if isempty(Sz)
  Zz = -ones(size(Zp));
else
  Zz = [(2+Sz*T)./(2-Sz*T)];
  Zz = postpad(Zz, p, -1);
end

if nargout==2, [Zz, Zp] = zp2tf(Zz, Zp, Zg); end
