# Supplementary material for: HFOApp: A MATLAB Graphical User Interface for High-Frequency Oscillation Marking
Source: eNeuro. 2021 Oct 8;8(5):ENEURO.0509-20.2021. doi: 10.1523/ENEURO.0509-20.2021 (PMC8503963; doi:10.1523/ENEURO.0509-20.2021)
Supplement: Extended Data 1 — HFO App Package V1. Download Extended Data 1, ZIP file. [file enu-eN-MNT-0509-20-s02.zip › HFOApp_Package_V1/External/fieldtrip/filtfilt.m]

% Copyright (C) 1999 Paul Kienzle
% Copyright (C) 2007 Francesco Potortì
% Copyright (C) 2008 Luca Citi
%
% This program is free software; you can redistribute it and/or modify
% it under the terms of the GNU General Public License as published by
% the Free Software Foundation; either version 2 of the License, or
% (at your option) any later version.
%
% This program is distributed in the hope that it will be useful,
% but WITHOUT ANY WARRANTY; without even the implied warranty of
% MERCHANTABILITY or FITNESS FOR A PARTICULAR PURPOSE.  See the
% GNU General Public License for more details.
%
% You should have received a copy of the GNU General Public License
% along with this program; If not, see <http://www.gnu.org/licenses/>.

% usage: y = filtfilt(b, a, x)
%
% Forward and reverse filter the signal. This corrects for phase
% distortion introduced by a one-pass filter, though it does square the
% magnitude response in the process. That's the theory at least.  In
% practice the phase correction is not perfect, and magnitude response
% is distorted, particularly in the stop band.
%%
% Example
%    [b, a]=butter(3, 0.1);                   % 10 Hz low-pass filter
%    t = 0:0.01:1.0;                         % 1 second sample
%    x=sin(2*pi*t*2.3)+0.25*randn(size(t));  % 2.3 Hz sinusoid+noise
%    y = filtfilt(b,a,x); z = filter(b,a,x); % apply filter
%    plot(t,x,';data;',t,y,';filtfilt;',t,z,';filter;')

% Changelog:
% 2000 02 pkienzle@kienzle.powernet.co.uk
%      - pad with zeros to load up the state vector on filter reverse.
%      - add example
% 2007 12 pot@gnu.org
%	    - use filtic to compute initial and final states
%      - work for multiple columns as well
% 2008 12 lciti@essex.ac.uk
%      - fixed instability issues with IIR filters and noisy inputs
%	    - initial states computed according to Likhterov & Kopeika, 2003
%      - use of a "reflection method" to reduce end effects
%      - added some basic tests

% TODO:  (pkienzle) My version seems to have similar quality to matlab,
%	but both are pretty bad.  They do remove gross lag errors, though.


function y = filtfilt(b, a, x)

if (nargin ~= 3)
    error('Usage: y=filtfilt(b,a,x)');
end

if (min(size(b)) > 1)
    warning('SOS structures not supported for FieldTrip drop-in filtfilt');
    error('Usage: y=filtfilt(b,a,x)');
end

rotate = (size(x, 1)==1);

if rotate	% a row vector
    x = x(:);			% make it a column vector
end

lx = size(x,1);
a = a(:).';
b = b(:).';
lb = length(b);
la = length(a);
n = max(lb, la);
lrefl = 3 * (n - 1);
if la < n, a(n) = 0; end
if lb < n, b(n) = 0; end

% Compute a the initial state taking inspiration from
% Likhterov & Kopeika, 2003. "Hardware-efficient technique for
%     minimizing startup transients in Direct Form II digital filters"
kdc = sum(b) / sum(a);
if (abs(kdc) < inf) % neither NaN nor +/- Inf
    si = fliplr(cumsum(fliplr(b - kdc * a)));
else
    si = zeros(size(a)); % fall back to zero initialization
end
si(1) = [];

y  = zeros(size(x));
for c = 1:size(x, 2)	% filter all columns, one by one
    v = [2*x(1,c)-x((lrefl+1):-1:2,c); x(:,c);
        2*x(end,c)-x((end-1):-1:end-lrefl,c)]; % a column vector
    % Do forward and reverse filtering
    v = filter(b,a,v,si*v(1));		       % forward filter
    v = flipud(filter(b,a,flipud(v),si*v(end))); % reverse filter
    y(:,c) = v((lrefl+1):(lx+lrefl));
end

if (rotate)			% x was a row vector
    y = rot90(y);		% rotate it back
end
