# Supplementary material for: HFOApp: A MATLAB Graphical User Interface for High-Frequency Oscillation Marking
Source: eNeuro. 2021 Oct 8;8(5):ENEURO.0509-20.2021. doi: 10.1523/ENEURO.0509-20.2021 (PMC8503963; doi:10.1523/ENEURO.0509-20.2021)
Supplement: Extended Data 1 — HFO App Package V1. Download Extended Data 1, ZIP file. [file enu-eN-MNT-0509-20-s02.zip › HFOApp_Package_V1/External/fieldtrip/windows.m]

% windows() - Symmetric window functions
%
% Usage:
%   >> h = windows(t, m);
%   >> h = windows(t, m, a);
%
% Inputs:
%   t - char array 'rectangular', 'bartlett', 'hann', 'hamming',
%       'blackman', 'blackmanharris', 'kaiser', or 'tukey'
%   m - scalar window length
%
% Optional inputs:
%   a - scalar or vector with window parameter(s)
%
% Output:
%   w - column vector window
%
% Author: Andreas Widmann, University of Leipzig, 2014

%123456789012345678901234567890123456789012345678901234567890123456789012

% Copyright (C) 2014 Andreas Widmann, University of Leipzig, widmann@uni-leipzig.de
%
% This program is free software; you can redistribute it and/or modify
% it under the terms of the GNU General Public License as published by
% the Free Software Foundation; either version 2 of the License, or
% (at your option) any later version.
%
% This program is distributed in the hope that it will be useful,
% but WITHOUT ANY WARRANTY; without even the implied warranty of
% MERCHANTABILITY or FITNESS FOR A PARTICULAR PURPOSE.  See the
% GNU General Public License for more details.
%
% You should have received a copy of the GNU General Public License
% along with this program; if not, write to the Free Software
% Foundation, Inc., 59 Temple Place, Suite 330, Boston, MA  02111-1307  USA
%
% $Id$

function w = windows(t, m, a)

if nargin < 2 || isempty(t) || isempty(m)
    ft_error('Not enough input arguments.');
end

% Check window length
if m ~= round(m)
    m = round(m);
    ft_warning('firws:nonIntegerWindowLength', 'Non-integer window length. Rounding to integer.')
end
if m < 1
    ft_error('Invalid window length.')
end

% Length 1
if m == 1
    w = 1;
    return;
end

% Even/odd?
isOddLength = mod(m, 2);
if isOddLength
    x = (0:(m - 1) / 2)' / (m - 1);
else
    x = (0:m / 2 - 1)' / (m - 1);
end

switch t
    case 'rectangular'
        w = ones(length(x), 1);
    case 'bartlett'
        w = 2 * x;
    case 'hann'
        a = 0.5;
        w = a - (1 - a) * cos(2 * pi * x);
    case 'hamming'
        a = 0.54;
        w = a - (1 - a) * cos(2 * pi * x);
    case 'blackman'
        a = [0.42 0.5 0.08 0];
        w = a(1) - a(2) * cos (2 * pi * x) + a(3) * cos(4 * pi * x) - a(4) * cos(6 * pi * x);
    case 'blackmanharris'
        a = [0.35875 0.48829 0.14128 0.01168];
        w = a(1) - a(2) * cos (2 * pi * x) + a(3) * cos(4 * pi * x) - a(4) * cos(6 * pi * x);
    case 'kaiser'
        if nargin < 3 || isempty(a)
            a = 0.5;
        end
        w = besseli(0, a * sqrt(1 - (2 * x - 1).^2)) / besseli(0, a);
    case 'tukey'
        if nargin < 3 || isempty(a)
            a = 0.5;
        end
        if a <= 0 % Rectangular
            w = ones(length(x), 1);
        elseif a >= 1 % Hann
            w = 0.5 - (1 - 0.5) * cos(2 * pi * x);
        else
            mTaper = floor((m - 1) * a / 2) + 1;
            xTaper = 2 * (0:mTaper - 1)' / (a * (m - 1)) - 1;
            w = [0.5 * (1 + cos(pi * xTaper)); ones(length(x) - mTaper, 1)];
        end
    otherwise
        ft_error('Unkown window type')
end

% Make symmetric
if isOddLength
    w = [w; w(end - 1:-1:1)];
else
    w = [w; w(end:-1:1)];
end

end
