# Supplementary material for: HFOApp: A MATLAB Graphical User Interface for High-Frequency Oscillation Marking
Source: eNeuro. 2021 Oct 8;8(5):ENEURO.0509-20.2021. doi: 10.1523/ENEURO.0509-20.2021 (PMC8503963; doi:10.1523/ENEURO.0509-20.2021)
Supplement: Extended Data 1 — HFO App Package V1. Download Extended Data 1, ZIP file. [file enu-eN-MNT-0509-20-s02.zip › HFOApp_Package_V1/External/freetb4matlab/AUTHORS]

2005,                       
2006,                       
2007                        
A. S. Hodel                 <a.s.hodel@eng.auburn.edu>
Aida Alvera-Azcárate       <aalvera@marine.usf.edu>
Alberto Pose                <apose@alu.itba.edu.ar>
Alberto Terruzzi            <t-albert@libero.it>
Alexander Barth             <abarth@marine.usf.edu>
Alois Schloegl              <a.schloegl@ieee.org>
Alois Schloegl <a.schloegl@ieee.org>	
%       This function is part of the NaN-toolbox
Alois Schloegl <a.schloegl@ieee.org>
% WWW: http://hci.tugraz.at/~schloegl/matlab/tsa/
Andreas Stahel              <Andreas.Stahel@bfh.ch>
Andreas Weingessel          <Andreas.Weingessel@ci.tuwien.ac.at>
Andrew Collier              <abcollier@users.sourceforge.net>
Andrew Gierth               
André Carezia              <andre@carezia.eng.br>
Andy Adler                  <adler@ncf.ca>
Anonymous                   
Arno Onken                  <asnelt@asnelt.org>
Arthur Jutan                
Auburn University           
Barre-Piquot                
Ben Sapp                    <bsapp@lanl.gov>
Berge-Gladel                
Bill Denney                 <bill@denney.ws>
Bruce T. Lowerre            
Carl Osterwisch             <osterwischc@asme.org>
Carlo de Falco              <carlo.defalco@gmail.com>
Carlo de Falco <cdf _AT_ users.sourceforge.net>, culpo@math.uni-wuppertal.de
Carlo de Falco, Culpo Massimiliano
Carlo de Falco, Massimiliano Culpo
Carvalho-Mariel             
Charalampos C. Tsimenidis   
Chee Kiang Goh              
Christian Kasess            
Christian Kotz              
Daniel Gunyan               
Daniel Heiserer             <Daniel.heiserer@physik.tu-muenchen.de>
Dave Cogdell                <cogdelld@asme.org>
David Bateman               
David Billinghurst          <David.Billinghurst@riotinto.com>
David Clem                  
Dept of Probability Theory and Statistics TU Wien
Eric Chassande-Mottin       
Eric Chassande-Mottin, CNRS (France)
Etienne Grossmann           <etienne@isr.ist.utl.pt>
FL                          <Friedrich.Leisch@ci.tuwien.ac.at>
Fabrice Bellard             
Francesco Potortì          
Francesco Potort�           <pot@gnu.org>
Frederick (Rick) A Niles    <niles@rickniles.com>
Fredrik Bulow               <fredrik.bulow@gmail.com>
Friedrich Leisch            <Friedrich.Leisch@ci.tuwien.ac.at>
Gabriele Pannocchia         <pannocchia@ing.unipi.it>
Gert Van den Eynde          
Gorka Lertxundi             
Grace Development Team      
Grzegorz Timoszuk           <gtimoszuk@gmail.com>
Guido van Rossum And Sundry Contributors
Hansgeorg Schwibbe          
Hayato Fujiwara             
Henrik Seidel               
Iain Murray                 
Jake Janovetz               <janovetz@uiuc.edu>
Jaroslav Hajek              <highegg@gmail.com>
Javier Enciso               
Jeff Orchard                <jjo@cs.sfu.ca>
Jeffrey E. Boyd             
Joao Cardoso                
Joerg Huber                 
Joerg Specht                
John Ingram                 <ingraje@eng.auburn.edu>
John W. Eaton               
Jonathan Stickel            
Jorge Barros de Abreu       
Jose Daniel Munoz Frias     
Jose Luis Gutierrez         <jlg@gmx.at>
Josep Mones i Teixidor      <jmones@puntbarra.com>
Joseph Wakeling             <joseph.wakeling@webdrake.net>
Juan Aguado                 
Julius O. Smith III         
Justus H. Piater            <Justus.Piater@ULg.ac.be>
KH                          <Kurt.Hornik@wu-wien.ac.at>
Kai Habel                   <kai.habel@gmx.de>
Kai P. Mueller              <mueller@ifr.ing.tu-bs.de>
Kurt Hornik                 <Kurt.Hornik@wu-wien.ac.at>
Lance Norskog And Sundry Contributors
Laurent Mazet               <mazet@crm.mot.com>
Leopoldo Cerbaro            <redbliss@libero.it>
Levente Torok / TorokLev@gmail.com
Luca Citi                   
Luca Favatella              <slackydeb@gmail.com>
Luiz Angelo Daros de Luca   <luizluca@gmail.com>
Lukasz Komsta, http://www.komsta.net/
Marc Compere                
Mark Spink                  
Mark Spink, 2007 Daniel Claxton
Mark Spink, 2007 Daniel Claxton, 2009 Carlo de Falco
Massimiliano Culpo, Carlo de Falco
Matthew W. Roberts          
Michael Creel               <michael.creel@uab.es>
Michael Goffioul            <michael.goffioul@swing.be>
Michel D. Schmid            <michaelschmid@users.sourceforge.net>
Mike Gross, Peter V. Lanspeary
Motorola Inc                
Muthiah Annamalai           <muthiah.annamalai@uta.edu>
N.J.Higham                  
Nadav Rotem                 <nadav256@hotmail.com>
Nicol N. Schraudolph        <schraudo@inf.ethz.ch>
Olaf Till                   <olaf.till@uni-jena.de>
P.R. Nienhuis               <106130.1515@compuserve.com>
Pascal Dupuis               
Patrick Houweling
%	Copyright (C) 2009 Alois Schloegl
Patrick Houweling
%	Copyright (C) 2009 Alois Schloegl	
%	$Id: AUTHORS 5907 2009-06-07 13:38:05Z hauberg $
Patrick Labbe               
Paul Eilers                 
Paul Kienzle                <pkienzle@users.sf.net>
Paulo Neis                  <p_neis@yahoo.com.br>
Per Persson                 <persquare@users.sf.net>
Peter Kovesi                
Peter L. Soendergaard       
Peter V. Lanspeary          
Petr Mikulik                
Phil Karn, KA9Q             
Piotr Krzyzanowski          <piotr.krzyzanowski@mimuw.edu.pl>
Quentin Spencer             <qspencer@ieee.org>
R. Bruce Tenison            <btenison@eng.auburn.edu>
Rafael Laboissiere          <rafael@laboissiere.net>
Rafael Vazquez              
Ray Muzic                   
Raymond E. Rogers           
Richard Shrager             
Rick Niles                  <niles@axp745.gsfc.nasa.gov>
Rick Richardson             
Rolf Fabian                 <fabian@tu-cottbus.de>
Sergey Kirgizov             
Soren Hauberg               
Stefan Gustavson            
Stefan Gustavson (stefan.gustavson@gmail.com)
Stefan van der Walt         <stefan@sun.ac.za>
Sylvain Pelissier           <sylvain.pelissier@gmail.com>
Søren Hauberg              
S�ren Hauberg               <hauberg at gmail dot com>
Teemu Ikonen                <tpikonen@pcu.helsinki.fi>
Thomas Kasper,              <thomaskasper@gmx.net>
Thomas Treichl              <treichl@users.sourceforge.net>
Tiago Charters de Azevedo   <tca@diale.org>
Tomer Altman                <taltman@lbl.gov>
Torsten Finke               <fi@igh-essen.com>
VZLU Prague                 
VZLU Prague, a.s., Czech Republic
Vinayak Dutt                <Dutt.Vinayak@mayo.EDU>
Willem J. Atsma             <watsma(at)users.sf.net>
William Poetra Yoga Hadisoeseno
Xavier Delacour             <xavier.delacour@gmail.com>
ZYED ben Mohamed EL HIDRI   
Zyed El Hidri               <zyedm79@yahoo.com>
culpo@math.uni-wuppertal.de 
culpo@math.uni-wuppertal.de, Carlo de Falco<cdf _AT_ users.sourceforge.net>
mds                         
msd                         
simone pernice              
