# Supplementary material for: HFOApp: A MATLAB Graphical User Interface for High-Frequency Oscillation Marking
Source: eNeuro. 2021 Oct 8;8(5):ENEURO.0509-20.2021. doi: 10.1523/ENEURO.0509-20.2021 (PMC8503963; doi:10.1523/ENEURO.0509-20.2021)
Supplement: Extended Data 1 — HFO App Package V1. Download Extended Data 1, ZIP file. [file enu-eN-MNT-0509-20-s02.zip › HFOApp_Package_V1/External/freetb4matlab/general/fb_interp1.m]

%# -*- texinfo -*-
%# @deftypefn {Function File} {@var{yi} =} interp1 (@var{x}, @var{y}, @var{xi})
%# @deftypefnx {Function File} {@var{yi} =} interp1 (@dots{}, @var{method})
%# @deftypefnx {Function File} {@var{yi} =} interp1 (@dots{}, @var{extrap})
%# @deftypefnx {Function File} {@var{pp} =} interp1 (@dots{}, 'pp')
%#
%# One-dimensional interpolation.  Interpolate @var{y}, defined at the
%# points @var{x}, at the points @var{xi}.  The sample points @var{x} 
%# must be monotonic.  If @var{y} is an array, treat the columns
%# of @var{y} separately.
%#
%# Method is one of:
%#
%# @table @asis
%# @item 'nearest'
%# Return the nearest neighbor.
%# @item 'linear'
%# Linear interpolation from nearest neighbors
%# @item 'pchip'
%# Piece-wise cubic hermite interpolating polynomial
%# @item 'cubic'
%# Cubic interpolation from four nearest neighbors
%# @item 'spline'
%# Cubic spline interpolation--smooth first and second derivatives
%# throughout the curve
%# @end table
%#
%# Appending '*' to the start of the above method forces @code{interp1}
%# to assume that @var{x} is uniformly spaced, and only @code{@var{x}
%# (1)} and @code{@var{x} (2)} are referenced.  This is usually faster,
%# and is never slower.  The default method is 'linear'.
%#
%# If @var{extrap} is the string 'extrap', then extrapolate values beyond
%# the endpoints.  If @var{extrap} is a number, replace values beyond the
%# endpoints with that number.  If @var{extrap} is missing, assume NA.
%#
%# If the string argument 'pp' is specified, then @var{xi} should not be
%# supplied and @code{interp1} returns the piece-wise polynomial that
%# can later be used with @code{ppval} to evaluate the interpolation.
%# There is an equivalence, such that @code{ppval (interp1 (@var{x},
%# @var{y}, @var{method}, 'pp'), @var{xi}) == interp1 (@var{x}, @var{y},
%# @var{xi}, @var{method}, 'extrap')}.
%#
%# Duplicate points in @var{x} specify a discontinuous interpolant.  There
%# should be at most 2 consecutive points with the same value.
%# The discontinuous interpolant is right-continuous if @var{x} is increasing,
%# left-continuous if it is decreasing.
%# Discontinuities are (currently) only allowed for 'nearest' and 'linear'
%# methods; in all other cases, @var{x} must be strictly monotonic.
%#
%# An example of the use of @code{interp1} is
%#
%# @example
%# @group
%# xf = [0:0.05:10];
%# yf = sin (2*pi*xf/5);
%# xp = [0:10];
%# yp = sin (2*pi*xp/5);
%# lin = interp1 (xp, yp, xf);
%# spl = interp1 (xp, yp, xf, 'spline');
%# cub = interp1 (xp, yp, xf, 'cubic');
%# near = interp1 (xp, yp, xf, 'nearest');
%# plot (xf, yf, 'r', xf, lin, 'g', xf, spl, 'b',
%#       xf, cub, 'c', xf, near, 'm', xp, yp, 'r*');
%# legend ('original', 'linear', 'spline', 'cubic', 'nearest')
%# @end group
%# @end example
%#
%# @seealso{interpft}
%# @end deftypefn

%# Author: Paul Kienzle
%# Date: 2000-03-25
%#    added 'nearest' as suggested by Kai Habel
%# 2000-07-17 Paul Kienzle
%#    added '*' methods and matrix y
%#    check for proper table lengths
%# 2002-01-23 Paul Kienzle
%#    fixed extrapolation

function yi = fb_interp1 (x, y, varargin)

  if (nargin < 3 || nargin > 6)
    print_usage ;
  end

  method = 'linear';
  extrap = NaN;
  xi = [];
  pp = false;
  firstnumeric = true;

  if (nargin > 2)
    for i = 1:length (varargin)
      arg = varargin{i};
      if (ischar (arg))
        arg = lower (arg);
        if (strcmp ('extrap', arg))
          extrap = 'extrap';
        elseif (strcmp ('pp', arg))
          pp = true;
        else
          method = arg;
        end
      else
        if (firstnumeric)
          xi = arg;
          firstnumeric = false;
        else
          extrap = arg;
        end
      end
    end
  end

  %# reshape matrices for convenience
  x = x(:);
  nx = size(x,1);
  szx = size (xi);
  if (isvector (y))
    y = y(:);
  elseif (isvector (xi))
    szx = length (xi);    
  end
  szy = size (y);
  y = y(:,:);
  [ny, nc] = size (y);
  xi = xi(:);

  %# determine sizes
  if (nx < 2 || ny < 2)
    error ('interp1: table too short');
  end

  %# check whether x is sorted; sort if not.
  if (~ issorted (x))
    [x, p] = sort (x);
    y = y(p,:);
  end

  starmethod = method(1) == '*';

  if (starmethod)
    dx = x(2) - x(1);
  else
    jumps = x(1:nx-1) == x(2:nx);
    have_jumps = any (jumps);
    if (have_jumps)
      if (any (strcmp (method, {'nearest', 'linear'})))
        if (any (jumps(1:nx-2) & jumps(2:nx-1)))
          warning ('interp1: extra points in discontinuities');
        end
      else
        error ('interp1: discontinuities not supported for method %s', method);
      end
    end
  end

  %# Proceed with interpolating by all methods.

  switch (method)
  case 'nearest'
    if (pp)
      yi = mkpp ([x(1); (x(1:nx-1)+x(2:nx))/2; x(nx)], y, szy(2:end));
    else
      idx = lookup (0.5*(x(1:nx-1)+x(2:nx)), xi) + 1;
      yi = y(idx,:);
    end
  case '*nearest'
    if (pp)
      yi = mkpp ([x(1); x(1)+[0.5:(nx-1)]'*dx; x(nx)], y, szy(2:end));
    else
      idx = max (1, min (ny, floor((xi-x(1))/dx+1.5)));
      yi = y(idx,:);
    end
  case 'linear'
    dy = diff (y);
    dx = diff (x);
    if (pp)
      coefs = [dy./dx, y(1:nx-1)];
      xx = x;
      if (have_jumps)
        %# Omit zero-size intervals.
        coefs(jumps) = [];
        xx(jumps) = [];
      end
      yi = mkpp (xx, coefs, szy(2:end));
    else
      %# find the interval containing the test point
      idx = lookup (x, xi, 'lr');
      %# use the endpoints of the interval to define a line
      s = (xi - x(idx))./dx(idx);
      yi = bsxfun (@times, s, dy(idx,:)) + y(idx,:);
      if (have_jumps)
        %# Fix the corner cases of discontinuities at boundaries.
        %# Internal discontinuities already handled correctly.
        if (jumps (1))
          mask = xi < x(1);
          yi(mask,:) = y(1*ones (1, sum (mask)),:);
        end
        if (jumps(nx-1))
          mask = xi >= x(nx);
          yi(mask,:) = y(nx*ones (1, sum (mask)),:);
        end
      end
    end
  case '*linear'
    dy = diff (y);
    if (pp)
      yi = mkpp (x(1) + [0:ny-1]*dx, [dy./dx, y(1:end-1)], szy(2:end));
    else
      %# find the interval containing the test point
      t = (xi - x(1))/dx + 1;
      idx = max (1, min (ny - 1, floor (t)));

      %# use the endpoints of the interval to define a line
      s = t - idx;
      yi = bsxfun (@times, s, dy(idx,:)) + y(idx,:);
    end
  case {'pchip', '*pchip'}
    if (nx == 2 || starmethod) 
      x = linspace (x(1), x(nx), ny);
    end
    %# Note that pchip's arguments are transposed relative to interp1
    if (pp)
      yi = pchip (x.', y.');
      yi.d = szy(2:end);
    else
      yi = pchip (x.', y.', xi.').';
    end

  case {'cubic', '*cubic'}
    if (nx < 4 || ny < 4)
      error ('interp1: table too short');
    end

    %# FIXME Is there a better way to treat pp return and *cubic
    if (starmethod && ~ pp)
      %# From: Miloje Makivic 
      %# http://www.npac.syr.edu/projects/nasa/MILOJE/final/node36.html
      t = (xi - x(1))/dx + 1;
      idx = max (min (floor (t), ny-2), 2);
      t = t - idx;
      t2 = t.*t;
      tp = 1 - 0.5*t;
      a = (1 - t2).*tp;
      b = (t2 + t).*tp;
      c = (t2 - t).*tp/3;
      d = (t2 - 1).*t/6;
      J = ones (1, nc);

      yi = a(:,J) .* y(idx,:) + b(:,J) .* y(idx+1,:) ...
      + c(:,J) .* y(idx-1,:) + d(:,J) .* y(idx+2,:);
    else
      if (starmethod)
        x = linspace (x(1), x(nx), ny).'; 
        nx = ny;
      end

      idx = lookup (x(2:nx-1), xi, 'lr');

      %# Construct cubic equations for each interval using divided
      %# differences (computation of c and d don't use divided differences
      %# but instead solve 2 equations for 2 unknowns). Perhaps
      %# reformulating this as a lagrange polynomial would be more efficient.
      i = 1:nx-3;
      J = ones (1, nc);
      dx = diff (x);
      dx2 = x(i+1).^2 - x(i).^2;
      dx3 = x(i+1).^3 - x(i).^3;
      a = diff (y, 3)./dx(i,J).^3/6;
      b = (diff (y(1:nx-1,:), 2)./dx(i,J).^2 - 6*a.*x(i+1,J))/2;
      c = (diff (y(1:nx-2,:), 1) - a.*dx3(:,J) - b.*dx2(:,J))./dx(i,J);
      d = y(i,:) - ((a.*x(i,J) + b).*x(i,J) + c).*x(i,J);

      if (pp)
        xs = [x(1);x(3:nx-2)];
        yi = mkpp ([x(1);x(3:nx-2);x(nx)], ...
                   [a(:), (b(:) + 3.*xs(:,J).*a(:)), ... 
                    (c(:) + 2.*xs(:,J).*b(:) + 3.*reshape(xs(:,J),[],1).^2.*a(:)), ...
                    (d(:) + xs(:,J).*c(:) + xs(:,J).^2.*b(:) + ...
                     xs(:,J).^3.*a(:))], szy(2:end));
      else
        yi = ((a(idx,:).*xi(:,J) + b(idx,:)).*xi(:,J) ...
              + c(idx,:)).*xi(:,J) + d(idx,:);
      end
    end
  case {'spline', '*spline'}
    if (nx == 2 || starmethod) 
      x = linspace(x(1), x(nx), ny); 
    end
    %# Note that spline's arguments are transposed relative to interp1
    if (pp)
      yi = spline (x.', y.');
      yi.d = szy(2:end);
    else
      yi = spline (x.', y.', xi.').';
    end
  otherwise
    error ('interp1: invalid method ''%s''', method);
  end

  if (~ pp)
    if (~ ischar (extrap))
      %# determine which values are out of range and set them to extrap,
      %# unless extrap == 'extrap'.
      minx = min (x(1), x(nx));
      maxx = max (x(1), x(nx));

      outliers = xi < minx | ~ (xi <= maxx); % this catches even NaNs
      yi(outliers, :) = extrap;
    end

    yi = reshape (yi, [szx, szy(2:end)]);
  end


%!demo
%! xf=0:0.05:10; yf = sin(2*pi*xf/5);
%! xp=0:10;      yp = sin(2*pi*xp/5);
%! lin=interp1(xp,yp,xf,'linear');
%! spl=interp1(xp,yp,xf,'spline');
%! cub=interp1(xp,yp,xf,'pchip');
%! near=interp1(xp,yp,xf,'nearest');
%! plot(xf,yf,'r',xf,near,'g',xf,lin,'b',xf,cub,'c',xf,spl,'m',xp,yp,'r*');
%! legend ('original','nearest','linear','pchip','spline')
%! %--------------------------------------------------------
%! % confirm that interpolated function matches the original

%!demo
%! xf=0:0.05:10; yf = sin(2*pi*xf/5);
%! xp=0:10;      yp = sin(2*pi*xp/5);
%! lin=interp1(xp,yp,xf,'*linear');
%! spl=interp1(xp,yp,xf,'*spline');
%! cub=interp1(xp,yp,xf,'*cubic');
%! near=interp1(xp,yp,xf,'*nearest');
%! plot(xf,yf,'r',xf,near,'g',xf,lin,'b',xf,cub,'c',xf,spl,'m',xp,yp,'r*');
%! legend ('*original','*nearest','*linear','*cubic','*spline')
%! %--------------------------------------------------------
%! % confirm that interpolated function matches the original

%!demo
%! t = 0 : 0.3 : pi; dt = t(2)-t(1);
%! n = length (t); k = 100; dti = dt*n/k;
%! ti = t(1) + [0 : k-1]*dti;
%! y = sin (4*t + 0.3) .* cos (3*t - 0.1);
%! ddyc = diff(diff(interp1(t,y,ti,'cubic'))./dti)./dti;
%! ddys = diff(diff(interp1(t,y,ti,'spline'))./dti)./dti;
%! ddyp = diff(diff(interp1(t,y,ti,'pchip'))./dti)./dti;
%! plot (ti(2:end-1), ddyc,'g+',ti(2:end-1),ddys,'b*', ...
%!       ti(2:end-1),ddyp,'c^');
%! legend('cubic','spline','pchip');
%! title('Second derivative of interpolated ''sin (4*t + 0.3) .* cos (3*t - 0.1)''');

%!demo
%! xf=0:0.05:10; yf = sin(2*pi*xf/5) - (xf >= 5);
%! xp=[0:.5:4.5,4.99,5:.5:10];      yp = sin(2*pi*xp/5) - (xp >= 5);
%! lin=interp1(xp,yp,xf,'linear');
%! near=interp1(xp,yp,xf,'nearest');
%! plot(xf,yf,'r',xf,near,'g',xf,lin,'b',xp,yp,'r*');
%! legend ('original','nearest','linear')
%! %--------------------------------------------------------
%! % confirm that interpolated function matches the original


%# For each type of interpolated test, confirm that the interpolated
%# value at the knots match the values at the knots.  Points away
%# from the knots are requested, but only 'nearest' and 'linear'
%# confirm they are the correct values.

%!shared xp, yp, xi, style
%! xp=0:2:10;      yp = sin(2*pi*xp/5);  
%! xi = [-1, 0, 2.2, 4, 6.6, 10, 11];


%# The following BLOCK/ENDBLOCK section is repeated for each style
%#    nearest, linear, cubic, spline, pchip
%# The test for ppval of cubic has looser tolerance, but otherwise
%# the tests are identical.
%# Note that the block checks style and *style; if you add more tests
%# before to add them to both sections of each block.  One test, 
%# style vs. *style, occurs only in the first section.
%# There is an ENDBLOCKTEST after the final block
%!test style = 'nearest';
%# BLOCK
%!assert (interp1(xp, yp, [min(xp)-1, max(xp)+1],style), [NA, NA]);
%!assert (interp1(xp,yp,xp,style), yp, 100*eps);
%!assert (interp1(xp,yp,xp',style), yp', 100*eps);
%!assert (interp1(xp',yp',xp',style), yp', 100*eps);
%!assert (interp1(xp',yp',xp,style), yp, 100*eps);
%!assert (isempty(interp1(xp',yp',[],style)));
%!assert (isempty(interp1(xp,yp,[],style)));
%!assert (interp1(xp,[yp',yp'],xi(:),style),...
%!        [interp1(xp,yp,xi(:),style),interp1(xp,yp,xi(:),style)]);
%!assert (interp1(xp,yp,xi,style),...
%!        interp1(fliplr(xp),fliplr(yp),xi,style),100*eps);
%!assert (ppval(interp1(xp,yp,style,'pp'),xi),
%!        interp1(xp,yp,xi,style,'extrap'),10*eps);
%!error interp1(1,1,1, style);
%!assert (interp1(xp,[yp',yp'],xi,style),
%!        interp1(xp,[yp',yp'],xi,['*',style]),100*eps);
%!test style=['*',style];
%!assert (interp1(xp, yp, [min(xp)-1, max(xp)+1],style), [NA, NA]);
%!assert (interp1(xp,yp,xp,style), yp, 100*eps);
%!assert (interp1(xp,yp,xp',style), yp', 100*eps);
%!assert (interp1(xp',yp',xp',style), yp', 100*eps);
%!assert (interp1(xp',yp',xp,style), yp, 100*eps);
%!assert (isempty(interp1(xp',yp',[],style)));
%!assert (isempty(interp1(xp,yp,[],style)));
%!assert (interp1(xp,[yp',yp'],xi(:),style),...
%!        [interp1(xp,yp,xi(:),style),interp1(xp,yp,xi(:),style)]);
%!assert (interp1(xp,yp,xi,style),...
%!        interp1(fliplr(xp),fliplr(yp),xi,style),100*eps);
%!assert (ppval(interp1(xp,yp,style,'pp'),xi),
%!        interp1(xp,yp,xi,style,'extrap'),10*eps);
%!error interp1(1,1,1, style);
%# ENDBLOCK
%!test style='linear';
%# BLOCK
%!assert (interp1(xp, yp, [min(xp)-1, max(xp)+1],style), [NA, NA]);
%!assert (interp1(xp,yp,xp,style), yp, 100*eps);
%!assert (interp1(xp,yp,xp',style), yp', 100*eps);
%!assert (interp1(xp',yp',xp',style), yp', 100*eps);
%!assert (interp1(xp',yp',xp,style), yp, 100*eps);
%!assert (isempty(interp1(xp',yp',[],style)));
%!assert (isempty(interp1(xp,yp,[],style)));
%!assert (interp1(xp,[yp',yp'],xi(:),style),...
%!        [interp1(xp,yp,xi(:),style),interp1(xp,yp,xi(:),style)]);
%!assert (interp1(xp,yp,xi,style),...
%!        interp1(fliplr(xp),fliplr(yp),xi,style),100*eps);
%!assert (ppval(interp1(xp,yp,style,'pp'),xi),
%!        interp1(xp,yp,xi,style,'extrap'),10*eps);
%!error interp1(1,1,1, style);
%!assert (interp1(xp,[yp',yp'],xi,style),
%!        interp1(xp,[yp',yp'],xi,['*',style]),100*eps);
%!test style=['*',style];
%!assert (interp1(xp, yp, [min(xp)-1, max(xp)+1],style), [NA, NA]);
%!assert (interp1(xp,yp,xp,style), yp, 100*eps);
%!assert (interp1(xp,yp,xp',style), yp', 100*eps);
%!assert (interp1(xp',yp',xp',style), yp', 100*eps);
%!assert (interp1(xp',yp',xp,style), yp, 100*eps);
%!assert (isempty(interp1(xp',yp',[],style)));
%!assert (isempty(interp1(xp,yp,[],style)));
%!assert (interp1(xp,[yp',yp'],xi(:),style),...
%!        [interp1(xp,yp,xi(:),style),interp1(xp,yp,xi(:),style)]);
%!assert (interp1(xp,yp,xi,style),...
%!        interp1(fliplr(xp),fliplr(yp),xi,style),100*eps);
%!assert (ppval(interp1(xp,yp,style,'pp'),xi),
%!        interp1(xp,yp,xi,style,'extrap'),10*eps);
%!error interp1(1,1,1, style);
%# ENDBLOCK
%!test style='cubic';
%# BLOCK
%!assert (interp1(xp, yp, [min(xp)-1, max(xp)+1],style), [NA, NA]);
%!assert (interp1(xp,yp,xp,style), yp, 100*eps);
%!assert (interp1(xp,yp,xp',style), yp', 100*eps);
%!assert (interp1(xp',yp',xp',style), yp', 100*eps);
%!assert (interp1(xp',yp',xp,style), yp, 100*eps);
%!assert (isempty(interp1(xp',yp',[],style)));
%!assert (isempty(interp1(xp,yp,[],style)));
%!assert (interp1(xp,[yp',yp'],xi(:),style),...
%!        [interp1(xp,yp,xi(:),style),interp1(xp,yp,xi(:),style)]);
%!assert (interp1(xp,yp,xi,style),...
%!        interp1(fliplr(xp),fliplr(yp),xi,style),100*eps);
%!assert (ppval(interp1(xp,yp,style,'pp'),xi),
%!        interp1(xp,yp,xi,style,'extrap'),100*eps);
%!error interp1(1,1,1, style);
%!assert (interp1(xp,[yp',yp'],xi,style),
%!        interp1(xp,[yp',yp'],xi,['*',style]),100*eps);
%!test style=['*',style];
%!assert (interp1(xp, yp, [min(xp)-1, max(xp)+1],style), [NA, NA]);
%!assert (interp1(xp,yp,xp,style), yp, 100*eps);
%!assert (interp1(xp,yp,xp',style), yp', 100*eps);
%!assert (interp1(xp',yp',xp',style), yp', 100*eps);
%!assert (interp1(xp',yp',xp,style), yp, 100*eps);
%!assert (isempty(interp1(xp',yp',[],style)));
%!assert (isempty(interp1(xp,yp,[],style)));
%!assert (interp1(xp,[yp',yp'],xi(:),style),...
%!        [interp1(xp,yp,xi(:),style),interp1(xp,yp,xi(:),style)]);
%!assert (interp1(xp,yp,xi,style),...
%!        interp1(fliplr(xp),fliplr(yp),xi,style),100*eps);
%!assert (ppval(interp1(xp,yp,style,'pp'),xi),
%!        interp1(xp,yp,xi,style,'extrap'),100*eps);
%!error interp1(1,1,1, style);
%# ENDBLOCK
%!test style='pchip';
%# BLOCK
%!assert (interp1(xp, yp, [min(xp)-1, max(xp)+1],style), [NA, NA]);
%!assert (interp1(xp,yp,xp,style), yp, 100*eps);
%!assert (interp1(xp,yp,xp',style), yp', 100*eps);
%!assert (interp1(xp',yp',xp',style), yp', 100*eps);
%!assert (interp1(xp',yp',xp,style), yp, 100*eps);
%!assert (isempty(interp1(xp',yp',[],style)));
%!assert (isempty(interp1(xp,yp,[],style)));
%!assert (interp1(xp,[yp',yp'],xi(:),style),...
%!        [interp1(xp,yp,xi(:),style),interp1(xp,yp,xi(:),style)]);
%!assert (interp1(xp,yp,xi,style),...
%!        interp1(fliplr(xp),fliplr(yp),xi,style),100*eps);
%!assert (ppval(interp1(xp,yp,style,'pp'),xi),
%!        interp1(xp,yp,xi,style,'extrap'),10*eps);
%!error interp1(1,1,1, style);
%!assert (interp1(xp,[yp',yp'],xi,style),
%!        interp1(xp,[yp',yp'],xi,['*',style]),100*eps);
%!test style=['*',style];
%!assert (interp1(xp, yp, [min(xp)-1, max(xp)+1],style), [NA, NA]);
%!assert (interp1(xp,yp,xp,style), yp, 100*eps);
%!assert (interp1(xp,yp,xp',style), yp', 100*eps);
%!assert (interp1(xp',yp',xp',style), yp', 100*eps);
%!assert (interp1(xp',yp',xp,style), yp, 100*eps);
%!assert (isempty(interp1(xp',yp',[],style)));
%!assert (isempty(interp1(xp,yp,[],style)));
%!assert (interp1(xp,[yp',yp'],xi(:),style),...
%!        [interp1(xp,yp,xi(:),style),interp1(xp,yp,xi(:),style)]);
%!assert (interp1(xp,yp,xi,style),...
%!        interp1(fliplr(xp),fliplr(yp),xi,style),100*eps);
%!assert (ppval(interp1(xp,yp,style,'pp'),xi),
%!        interp1(xp,yp,xi,style,'extrap'),10*eps);
%!error interp1(1,1,1, style);
%# ENDBLOCK
%!test style='spline';
%# BLOCK
%!assert (interp1(xp, yp, [min(xp)-1, max(xp)+1],style), [NA, NA]);
%!assert (interp1(xp,yp,xp,style), yp, 100*eps);
%!assert (interp1(xp,yp,xp',style), yp', 100*eps);
%!assert (interp1(xp',yp',xp',style), yp', 100*eps);
%!assert (interp1(xp',yp',xp,style), yp, 100*eps);
%!assert (isempty(interp1(xp',yp',[],style)));
%!assert (isempty(interp1(xp,yp,[],style)));
%!assert (interp1(xp,[yp',yp'],xi(:),style),...
%!        [interp1(xp,yp,xi(:),style),interp1(xp,yp,xi(:),style)]);
%!assert (interp1(xp,yp,xi,style),...
%!        interp1(fliplr(xp),fliplr(yp),xi,style),100*eps);
%!assert (ppval(interp1(xp,yp,style,'pp'),xi),
%!        interp1(xp,yp,xi,style,'extrap'),10*eps);
%!error interp1(1,1,1, style);
%!assert (interp1(xp,[yp',yp'],xi,style),
%!        interp1(xp,[yp',yp'],xi,['*',style]),100*eps);
%!test style=['*',style];
%!assert (interp1(xp, yp, [min(xp)-1, max(xp)+1],style), [NA, NA]);
%!assert (interp1(xp,yp,xp,style), yp, 100*eps);
%!assert (interp1(xp,yp,xp',style), yp', 100*eps);
%!assert (interp1(xp',yp',xp',style), yp', 100*eps);
%!assert (interp1(xp',yp',xp,style), yp, 100*eps);
%!assert (isempty(interp1(xp',yp',[],style)));
%!assert (isempty(interp1(xp,yp,[],style)));
%!assert (interp1(xp,[yp',yp'],xi(:),style),...
%!        [interp1(xp,yp,xi(:),style),interp1(xp,yp,xi(:),style)]);
%!assert (interp1(xp,yp,xi,style),...
%!        interp1(fliplr(xp),fliplr(yp),xi,style),100*eps);
%!assert (ppval(interp1(xp,yp,style,'pp'),xi),
%!        interp1(xp,yp,xi,style,'extrap'),10*eps);
%!error interp1(1,1,1, style);
%# ENDBLOCK
%# ENDBLOCKTEST

%!# test linear extrapolation
%!assert (interp1([1:5],[3:2:11],[0,6],'linear','extrap'), [1, 13], eps);
%!assert (interp1(xp, yp, [-1, max(xp)+1],'linear',5), [5, 5]);

%!error interp1
%!error interp1(1:2,1:2,1,'bogus')

%!assert (interp1(1:2,1:2,1.4,'nearest'),1);
%!error interp1(1,1,1, 'linear');
%!assert (interp1(1:2,1:2,1.4,'linear'),1.4);
%!error interp1(1:3,1:3,1, 'cubic');
%!assert (interp1(1:4,1:4,1.4,'cubic'),1.4);
%!error interp1(1:2,1:2,1, 'spline');
%!assert (interp1(1:3,1:3,1.4,'spline'),1.4);

%!error interp1(1,1,1, '*nearest');
%!assert (interp1(1:2:4,1:2:4,1.4,'*nearest'),1);
%!error interp1(1,1,1, '*linear');
%!assert (interp1(1:2:4,1:2:4,[0,1,1.4,3,4],'*linear'),[NA,1,1.4,3,NA]);
%!error interp1(1:3,1:3,1, '*cubic');
%!assert (interp1(1:2:8,1:2:8,1.4,'*cubic'),1.4);
%!error interp1(1:2,1:2,1, '*spline');
%!assert (interp1(1:2:6,1:2:6,1.4,'*spline'),1.4);

%!assert (interp1([3,2,1],[3,2,2],2.5),2.5)

%!assert (interp1 ([1,2,2,3,4],[0,1,4,2,1],[-1,1.5,2,2.5,3.5], 'linear', 'extrap'), [-2,0.5,4,3,1.5])
%!assert (interp1 ([4,4,3,2,0],[0,1,4,2,1],[1.5,4,4.5], 'linear'), [0,1,NA])

%# Copyright (C) 2000, 2006, 2007, 2008, 2009 Paul Kienzle
%# Copyright (C) 2009 VZLU Prague
%#
%# This file is part of Octave.
%#
%# Octave is free software; you can redistribute it and/or modify it
%# under the terms of the GNU General Public License as published by
%# the Free Software Foundation; either version 3 of the License, or (at
%# your option) any later version.
%#
%# Octave is distributed in the hope that it will be useful, but
%# WITHOUT ANY WARRANTY; without even the implied warranty of
%# MERCHANTABILITY or FITNESS FOR A PARTICULAR PURPOSE.  See the GNU
%# General Public License for more details.
%#
%# You should have received a copy of the GNU General Public License
%# along with Octave; see the file COPYING.  If not, see
%# <http://www.gnu.org/licenses/>.
