# Supplementary material for: HFOApp: A MATLAB Graphical User Interface for High-Frequency Oscillation Marking
Source: eNeuro. 2021 Oct 8;8(5):ENEURO.0509-20.2021. doi: 10.1523/ENEURO.0509-20.2021 (PMC8503963; doi:10.1523/ENEURO.0509-20.2021)
Supplement: Extended Data 1 — HFO App Package V1. Download Extended Data 1, ZIP file. [file enu-eN-MNT-0509-20-s02.zip › HFOApp_Package_V1/External/freetb4matlab/general/fb_postpad.m]

%# -*- texinfo -*-
%# @deftypefn  {Function File} {} postpad (@var{x}, @var{l}, @var{c})
%# @deftypefnx {Function File} {} postpad (@var{x}, @var{l}, @var{c}, @var{dim})
%# @seealso{prepad, resize}
%# @end deftypefn

%# Author: Tony Richardson <arichard@stark.cc.oh.us>
%# Created: June 1994

function y = postpad (x, l, c, dim)

  if (nargin < 2 || nargin > 4)
    print_usage ;
  end

  if (nargin < 3 || isempty (c))
    c = 0;
  else
    if (~ isscalar (c))
      error ('postpad: third argument must be empty or a scalar');
    end
  end

  nd = ndims (x);
  sz = size (x);
  if (nargin < 4)
    %# Find the first non-singleton dimension
    dim = find (sz > 1, 1);
    if (isempty (dim))
      dim = 1;
    end
  else
    if (~(isscalar (dim) && dim == fix (dim)) || ...
        ~(1 <= dim && dim <= nd))
      error ('postpad: DIM must be an integer and a valid dimension');
    end
  end

  if (~ isscalar (l) || l < 0)
    error ('postpad: second argument must be a positive scaler');
  end

  if (dim > nd)
    sz(nd+1:dim) = 1;
  end

  d = sz (dim);

  if (d >= l)
    idx = cell(1) ;
    for i = 1:nd
      idx{i} = 1:sz(i);
    end
    idx{dim} = 1:l;
    y = x(idx{:});
  else
    sz (dim) = l - d;
    y = cat (dim, x, c * ones (sz));
  end


%# Copyright (C) 1994, 1995, 1996, 1997, 1998, 2000, 2002, 2004, 2005,
%#               2006, 2007, 2008, 2009 John W. Eaton
%#
%# This file is part of Octave.
%#
%# Octave is free software; you can redistribute it and/or modify it
%# under the terms of the GNU General Public License as published by
%# the Free Software Foundation; either version 3 of the License, or (at
%# your option) any later version.
%#
%# Octave is distributed in the hope that it will be useful, but
%# WITHOUT ANY WARRANTY; without even the implied warranty of
%# MERCHANTABILITY or FITNESS FOR A PARTICULAR PURPOSE.  See the GNU
%# General Public License for more details.
%#
%# You should have received a copy of the GNU General Public License
%# along with Octave; see the file COPYING.  If not, see
%# <http://www.gnu.org/licenses/>.
