# Supplementary material for: HFOApp: A MATLAB Graphical User Interface for High-Frequency Oscillation Marking
Source: eNeuro. 2021 Oct 8;8(5):ENEURO.0509-20.2021. doi: 10.1523/ENEURO.0509-20.2021 (PMC8503963; doi:10.1523/ENEURO.0509-20.2021)
Supplement: Extended Data 1 — HFO App Package V1. Download Extended Data 1, ZIP file. [file enu-eN-MNT-0509-20-s02.zip › HFOApp_Package_V1/External/freetb4matlab/README.FREETB4MATLAB]

The aim of "Free toolboxes for Matlab" (FreeTb4Matlab) is to make functions from Octave and Octave-forge 
usable with Matlab. Automated tools (like Oct2mat and freetb4matlab) and manual modifications were applied. 


The automated conversion of OCT2MAT is very much improved. 
Several sanity checks are used to perform manual correction of the code. 


Alois Schloegl, Mai 2010
