# Supplementary material for: HFOApp: A MATLAB Graphical User Interface for High-Frequency Oscillation Marking
Source: eNeuro. 2021 Oct 8;8(5):ENEURO.0509-20.2021. doi: 10.1523/ENEURO.0509-20.2021 (PMC8503963; doi:10.1523/ENEURO.0509-20.2021)
Supplement: Extended Data 1 — HFO App Package V1. Download Extended Data 1, ZIP file. [file enu-eN-MNT-0509-20-s02.zip › HFOApp_Package_V1/External/freetb4matlab/signal/fb_bilinear.m]

%# usage: [Zz, Zp, Zg] = bilinear(Sz, Sp, Sg, T)
%#        [Zb, Za] = bilinear(Sb, Sa, T)
%#
%# Transform a s-plane filter specification into a z-plane
%# specification. Filters can be specified in either zero-pole-gain or
%# transfer function form. The input form does not have to match the
%# output form. 1/T is the sampling frequency represented in the z plane.
%#
%# Note: this differs from the bilinear function in the signal processing
%# toolbox, which uses 1/T rather than T.
%#
%# Theory: Given a piecewise flat filter design, you can transform it
%# from the s-plane to the z-plane while maintaining the band edges by
%# means of the bilinear transform.  This maps the left hand side of the
%# s-plane into the interior of the unit circle.  The mapping is highly
%# non-linear, so you must design your filter with band edges in the
%# s-plane positioned at 2/T tan(w*T/2) so that they will be positioned
%# at w after the bilinear transform is complete.
%#
%# The following table summarizes the transformation:
%#
%# +---------------+-----------------------+----------------------+
%# | Transform     | Zero at x             | Pole at x            |
%# |    H(S)       |   H(S) = S-x          |    H(S)=1/(S-x)      |
%# +---------------+-----------------------+----------------------+
%# |       2 z-1   | zero: (2+xT)/(2-xT)   | zero: -1             |
%# |  S -> - ---   | pole: -1              | pole: (2+xT)/(2-xT)  |
%# |       T z+1   | gain: (2-xT)/T        | gain: (2-xT)/T       |
%# +---------------+-----------------------+----------------------+
%#
%# With tedious algebra, you can derive the above formulae yourself by
%# substituting the transform for S into H(S)=S-x for a zero at x or
%# H(S)=1/(S-x) for a pole at x, and converting the result into the
%# form:
%#
%#    H(Z)=g prod(Z-Xi)/prod(Z-Xj)
%#
%# Please note that a pole and a zero at the same place exactly cancel.
%# This is significant since the bilinear transform creates numerous
%# extra poles and zeros, most of which cancel. Those which do not
%# cancel have a 'fill-in' effect, extending the shorter of the sets to
%# have the same number of as the longer of the sets of poles and zeros
%# (or at least split the difference in the case of the band pass
%# filter). There may be other opportunistic cancellations but I will
%# not check for them.
%#
%# Also note that any pole on the unit circle or beyond will result in
%# an unstable filter.  Because of cancellation, this will only happen
%# if the number of poles is smaller than the number of zeros.  The
%# analytic design methods all yield more poles than zeros, so this will
%# not be a problem.
%#
%# References:
%#
%# Proakis & Manolakis (1992). Digital Signal Processing. New York:
%# Macmillan Publishing Company.

%# Author: Paul Kienzle <pkienzle@users.sf.net>

function [Zz, Zp, Zg] = bilinear(Sz, Sp, Sg, T)

  if nargin==3
    T = Sg;
    [Sz, Sp, Sg] = tf2zp(Sz, Sp);
  elseif nargin~=4
    error('[Zz, Zp, Zg]=bilinear(Sz,Sp,Sg,T) or [Zb, Za]=blinear(Sb,Sa,T)');
  end;

  p = length(Sp);
  z = length(Sz);
  if z > p || p==0
    error('bilinear: must have at least as many poles as zeros in s-plane');
  end

%# ----------------  -------------------------  ------------------------
%# Bilinear          zero: (2+xT)/(2-xT)        pole: (2+xT)/(2-xT)
%#      2 z-1        pole: -1                   zero: -1
%# S -> - ---        gain: (2-xT)/T             gain: (2-xT)/T
%#      T z+1
%# ----------------  -------------------------  ------------------------
  Zg = real(Sg * prod((2-Sz*T)/T) / prod((2-Sp*T)/T));
  Zp = (2+Sp*T)./(2-Sp*T);
  if isempty(Sz)
    Zz = -ones(size(Zp));
  else
    Zz = [(2+Sz*T)./(2-Sz*T)];
    Zz = fb_postpad(Zz, p, -1);
  end

  if nargout==2, [Zz, Zp] = zp2tf(Zz, Zp, Zg); end


%# Copyright (C) 1999 Paul Kienzle
%#
%# This program is free software; you can redistribute it and/or modify
%# it under the terms of the GNU General Public License as published by
%# the Free Software Foundation; either version 2 of the License, or
%# (at your option) any later version.
%#
%# This program is distributed in the hope that it will be useful,
%# but WITHOUT ANY WARRANTY; without even the implied warranty of
%# MERCHANTABILITY or FITNESS FOR A PARTICULAR PURPOSE.  See the
%# GNU General Public License for more details.
%#
%# You should have received a copy of the GNU General Public License
%# along with this program; If not, see <http://www.gnu.org/licenses/>.
