# Supplementary material for: HFOApp: A MATLAB Graphical User Interface for High-Frequency Oscillation Marking
Source: eNeuro. 2021 Oct 8;8(5):ENEURO.0509-20.2021. doi: 10.1523/ENEURO.0509-20.2021 (PMC8503963; doi:10.1523/ENEURO.0509-20.2021)
Supplement: Extended Data 1 — HFO App Package V1. Download Extended Data 1, ZIP file. [file enu-eN-MNT-0509-20-s02.zip › HFOApp_Package_V1/External/freetb4matlab/signal/fb_cheb2ord.m]

%# Compute chebyshev type II filter order and cutoff for the desired response
%# characteristics. Rp is the allowable decibels of ripple in the pass 
%# band. Rs is the minimum attenuation in the stop band.
%#
%# [n, Wc] = cheb2ord(Wp, Ws, Rp, Rs)
%#     Low pass (Wp<Ws) or high pass (Wp>Ws) filter design.  Wp is the
%#     pass band edge and Ws is the stop band edge.  Frequencies are
%#     normalized to [0,1], corresponding to the range [0,Fs/2].
%# 
%# [n, Wc] = cheb2ord([Wp1, Wp2], [Ws1, Ws2], Rp, Rs)
%#     Band pass (Ws1<Wp1<Wp2<Ws2) or band reject (Wp1<Ws1<Ws2<Wp2)
%#     filter design. Wp gives the edges of the pass band, and Ws gives
%#     the edges of the stop band.
%#
%# Theory: 
%#
%# See also: cheby2

function [n, Wc] = cheb2ord(Wp, Ws, Rp, Rs)

  if nargin ~= 4
    error('[n, Wn] = cheb2ord(Wp, Ws, Rp, Rs)');
  elseif length(Wp) ~= length(Ws)
    error('cheb2ord: Wp and Ws must have the same length');
  elseif length(Wp) ~= 1 && length(Wp) ~= 2
    error('cheb2ord: Wp,Ws must have length 1 or 2');
  elseif length(Wp) == 2 && ...
    	(all(Wp>Ws) || all(Ws>Wp) || diff(Wp)<=0 || diff(Ws)<=0)
    error('cheb2ord: Wp(1)<Ws(1)<Ws(2)<Wp(2) or Ws(1)<Wp(1)<Wp(2)<Ws(2)');
  end

  T = 2;

  %# returned frequency is the same as the input frequency
  Wc = Ws;

  %# warp the target frequencies according to the bilinear transform
  Ws = (2/T)*tan(pi*Ws./T);
  Wp = (2/T)*tan(pi*Wp./T);

  if (Wp(1) < Ws(1))
    %# low pass
    if (length(Wp) == 1)
      Wa = Wp/Ws;
    else
      %# band reject
      error ('band reject is not implement yet.');
    end;
  else
   %# if high pass, reverse the sense of the test
   if (length(Wp) == 1)
      Wa = Ws/Wp;
    else
      %# band pass 
      Wa=(Wp.^2 - Ws(1)*Ws(2))./(Wp*(Ws(1)-Ws(2)));
    end;
  end;
  Wa = min(abs(Wa));

  %# compute minimum n which satisfies all band edge conditions
  stop_atten = 10^(abs(Rs)/10);
  pass_atten = 10^(abs(Rp)/10);
  n = ceil(acosh(sqrt((stop_atten-1)/(pass_atten-1)))/acosh(1/Wa));
    


%!demo
%! Fs = 10000; 
%! [n, Wc] = cheb2ord (1000/(Fs/2), 1200/(Fs/2), 0.5, 29);
%!
%! subplot (221);
%! plot ([0, 1000, 1000, 0, 0], [0, 0, -0.5, -0.5, 0], ';;');
%! hold on;
%! grid;
%! title('Pass band Wp=1000 Rp=0.0');
%! xlabel('Frequency (Hz)');
%! ylabel('Attenuation (dB)');
%! [b, a] = cheby2 (n, 29, Wc);
%! [h, w] = freqz (b, a, [], Fs);
%! plot (w, 20*log10(abs(h)), ';;');
%! axis ([ 0, 1500, -1, 0]);
%! hold off;
%!
%! subplot (222);
%! plot ([1200, Fs/2, Fs/2, 1200, 1200], [-29, -29, -500, -500, -29], ';;');
%! hold on;
%! axis ([ 0, Fs/2, -250, 0]);
%! title('Stop band Ws=1200 Rs=29');
%! xlabel('Frequency (Hz)');
%! ylabel('Attenuation (dB)');
%! grid;
%! [b, a] = cheby2 (n, 29, Wc);
%! [h, w] = freqz (b, a, [], Fs);
%! plot (w, 20*log10(abs(h)), ';;');
%! hold off;
%!
%! subplot (223);
%! plot ([0, 1000, 1000, 0, 0], [0, 0, -0.5, -0.5, 0], ';;');
%! hold on;
%! axis ([ 800, 1010, -0.6, -0.0]);
%! title('Pass band detail Wp=1000 Rp=0.5');
%! xlabel('Frequency (Hz)');
%! ylabel('Attenuation (dB)');
%! grid;
%! [b, a] = cheby2 (n, 29, Wc);
%! [h, w] = freqz (b, a, [800:1010], Fs);
%! plot (w, 20*log10(abs(h)), 'r;filter n;');
%! [b, a] = cheby2 (n-1, 29, Wc);
%! [h, w] = freqz (b, a, [800:1010], Fs);
%! plot (w, 20*log10(abs(h)), 'b;filter n-1;');
%! [b, a] = cheby2 (n+1, 29, Wc);
%! [h, w] = freqz (b, a, [800:1010], Fs);
%! plot (w, 20*log10(abs(h)), 'g;filter n+1;');
%! hold off;
%!
%! subplot (224);
%! plot ([1200, Fs/2, Fs/2, 1200, 1200], [-29, -29, -500, -500, -29], ';;');
%! hold on;
%! axis ([ 1190, 1210, -40, -20]);
%! title('Stop band detail Wp=1200 Rp=29');
%! xlabel('Frequency (Hz)');
%! ylabel('Attenuation (dB)');
%! grid;
%! [b, a] = cheby2 (n, 29, Wc);
%! [h, w] = freqz (b, a, [1190:1210], Fs);
%! plot (w, 20*log10(abs(h)), 'r;filter n;');
%! [b, a] = cheby2 (n-1, 29, Wc);
%! [h, w] = freqz (b, a, [1190:1210], Fs);
%! plot (w, 20*log10(abs(h)), 'b;filter n-1;');
%! [b, a] = cheby2 (n+1, 29, Wc);
%! [h, w] = freqz (b, a, [1190:1210], Fs);
%! plot (w, 20*log10(abs(h)), 'g;filter n+1;');
%! hold off;

%# Copyright (C) 2000 Paul Kienzle
%#
%# This program is free software; you can redistribute it and/or modify
%# it under the terms of the GNU General Public License as published by
%# the Free Software Foundation; either version 2 of the License, or
%# (at your option) any later version.
%#
%# This program is distributed in the hope that it will be useful,
%# but WITHOUT ANY WARRANTY; without even the implied warranty of
%# MERCHANTABILITY or FITNESS FOR A PARTICULAR PURPOSE.  See the
%# GNU General Public License for more details.
%#
%# You should have received a copy of the GNU General Public License
%# along with this program; If not, see <http://www.gnu.org/licenses/>.
