# Supplementary material for: HFOApp: A MATLAB Graphical User Interface for High-Frequency Oscillation Marking
Source: eNeuro. 2021 Oct 8;8(5):ENEURO.0509-20.2021. doi: 10.1523/ENEURO.0509-20.2021 (PMC8503963; doi:10.1523/ENEURO.0509-20.2021)
Supplement: Extended Data 1 — HFO App Package V1. Download Extended Data 1, ZIP file. [file enu-eN-MNT-0509-20-s02.zip › HFOApp_Package_V1/External/freetb4matlab/signal/fb_cheby2.m]

%# Generate an Chebyshev type II filter with Rs dB of stop band attenuation.
%# 
%# [b, a] = cheby2(n, Rs, Wc)
%#    low pass filter with cutoff pi*Wc radians
%#
%# [b, a] = cheby2(n, Rs, Wc, 'high')
%#    high pass filter with cutoff pi*Wc radians
%#
%# [b, a] = cheby2(n, Rs, [Wl, Wh])
%#    band pass filter with edges pi*Wl and pi*Wh radians
%#
%# [b, a] = cheby2(n, Rs, [Wl, Wh], 'stop')
%#    band reject filter with edges pi*Wl and pi*Wh radians
%#
%# [z, p, g] = cheby2(...)
%#    return filter as zero-pole-gain rather than coefficients of the
%#    numerator and denominator polynomials.
%#
%# [...] = cheby2(...,'s')
%#     return a Laplace space filter, W can be larger than 1.
%# 
%# [a,b,c,d] = cheby2(...)
%#  return  state-space matrices 
%# 
%# References: 
%#
%# Parks & Burrus (1987). Digital Filter Design. New York:
%# John Wiley & Sons, Inc.

%# Author: Paul Kienzle <pkienzle@users.sf.net>
%# Modified: Doug Stewart Feb. 2003

function [a,b,c,d] = fb_cheby2(n, Rs, W, varargin)

  if (nargin>5 || nargin<3) || (nargout>4 || nargout<2)
    error ('[b, a] or [z, p, g] or [a,b,c,d]= cheby2 (n, Rs, W, [, ''ftype''][,''s''])');
  end

  %# interpret the input parameters
  if (~(length(n)==1 && n == round(n) && n > 0))
    error ('cheby2: filter order n must be a positive integer');
  end


  stop = 0;
  digital = 1;  
  for i=1:length(varargin)
    switch varargin{i}
    case 's', digital = 0;
    case 'z', digital = 1;
    case { 'high', 'stop' }, stop = 1;
    case { 'low',  'pass' }, stop = 0;
    otherwise,  error ('cheby2: expected [high|stop] or [s|z]');
    end
  end

  [r, c]=size(W);
  if (~(length(W)<=2 && (r==1 || c==1)))
    error ('cheby2: frequency must be given as w0 or [w0, w1]');
  elseif (~(length(W)==1 || length(W) == 2))
    error ('cheby2: only one filter band allowed');
  elseif (length(W)==2 && ~(W(1) < W(2)))
    error ('cheby2: first band edge must be smaller than second');
  end

  if ( digital && ~all(W >= 0 & W <= 1))
    error ('cheby2: critical frequencies must be in (0 1)');
  elseif ( ~digital && ~all(W >= 0 ))
    error ('cheby2: critical frequencies must be in (0 inf)');
  end

  if (Rs < 0)
    error('cheby2: stopband attenuation must be positive decibels');
  end

  %# Prewarp to the band edges to s plane
  if digital
    T = 2;       % sampling frequency of 2 Hz
    W = 2/T*tan(pi*W/T);
  end

  %# Generate splane poles and zeros for the chebyshev type 2 filter
  %# From: Stearns, SD; David, RA; (1988). Signal Processing Algorithms. 
  %#       New Jersey: Prentice-Hall.
  C = 1;			% default cutoff frequency
  lambda = 10^(Rs/20);
  phi = log(lambda + sqrt(lambda^2-1))/n;
  theta = pi*([1:n]-0.5)/n;
  alpha = -sinh(phi)*sin(theta);
  beta = cosh(phi)*cos(theta);
  if (rem(n,2))
    %# drop theta==pi/2 since it results in a zero at infinity
    zero = 1i*C./cos(theta([1:(n-1)/2, (n+3)/2:n]));
  else
   zero = 1i*C./cos(theta);
  end
  pole = C./(alpha.^2+beta.^2).*(alpha-1i*beta);

  %# Compensate for amplitude at s=0
  %# Because of the vagaries of floating point computations, the
  %# prod(pole)/prod(zero) sometimes comes out as negative and
  %# with a small imaginary component even though analytically
  %# the gain will always be positive, hence the abs(real(...))
  gain = abs(real(prod(pole)/prod(zero)));

  %# splane frequency transform
  [zero, pole, gain] = fb_sftrans(zero, pole, gain, W, stop);

  %# Use bilinear transform to convert poles to the z plane
  if digital
    [zero, pole, gain] = fb_bilinear(zero, pole, gain, T);
  end

  %# convert to the correct output form
  if nargout==2, 
    a = real(gain*poly(zero));
    b = real(poly(pole));
  elseif nargout==3,
    a = zero;
    b = pole;
    c = gain;
  else
    %# output ss results 
    [a, b, c, d] = zp2ss (zero, pole, gain);
  end


%# Copyright (C) 1999 Paul Kienzle
%#
%# This program is free software; you can redistribute it and/or modify
%# it under the terms of the GNU General Public License as published by
%# the Free Software Foundation; either version 2 of the License, or
%# (at your option) any later version.
%#
%# This program is distributed in the hope that it will be useful,
%# but WITHOUT ANY WARRANTY; without even the implied warranty of
%# MERCHANTABILITY or FITNESS FOR A PARTICULAR PURPOSE.  See the
%# GNU General Public License for more details.
%#
%# You should have received a copy of the GNU General Public License
%# along with this program; If not, see <http://www.gnu.org/licenses/>.
