# Supplementary material for: HFOApp: A MATLAB Graphical User Interface for High-Frequency Oscillation Marking
Source: eNeuro. 2021 Oct 8;8(5):ENEURO.0509-20.2021. doi: 10.1523/ENEURO.0509-20.2021 (PMC8503963; doi:10.1523/ENEURO.0509-20.2021)
Supplement: Extended Data 1 — HFO App Package V1. Download Extended Data 1, ZIP file. [file enu-eN-MNT-0509-20-s02.zip › HFOApp_Package_V1/External/freetb4matlab/signal/fb_fir1.m]

%# usage: b = fb_fir1(n, w [, type] [, window] [, noscale])
%#
%# Produce an order n FIR filter with the given frequency cutoff,
%# returning the n+1 filter coefficients in b.  
%#
%# n: order of the filter (1 less than the length of the filter)
%# w: band edges
%#    strictly increasing vector in range [0, 1]
%#    singleton for highpass or lowpass, vector pair for bandpass or
%#    bandstop, or vector for alternating pass/stop filter.
%# type: choose between pass and stop bands
%#    'high' for highpass filter, cutoff at w
%#    'stop' for bandstop filter, edges at w = [lo, hi]
%#    'DC-0' for bandstop as first band of multiband filter
%#    'DC-1' for bandpass as first band of multiband filter
%# window: smoothing window
%#    defaults to hamming(n+1) row vector
%#    returned filter is the same shape as the smoothing window
%# noscale: choose whether to normalize or not
%#    'scale': set the magnitude of the center of the first passband to 1
%#    'noscale': don't normalize
%#
%# To apply the filter, use the return vector b:
%#       y=filter(b,1,x);
%#
%# Examples:
%#   freqz(fir1(40,0.3));
%#   freqz(fir1(15,[0.2, 0.5], 'stop'));  # note the zero-crossing at 0.1
%#   freqz(fir1(15,[0.2, 0.5], 'stop', 'noscale'));

%# TODO: Consider using exact expression (in terms of sinc) for the
%# TODO:    impulse response rather than relying on fir2.
%# TODO: Find reference to the requirement that order be even for
%# TODO:    filters that end high.  Figure out what to do with the
%# TODO:    window in these cases
function b = fb_fir1(n, w, varargin)

  if nargin < 2 || nargin > 5
    error('b = fir1(n, w [, type] [, window] [, noscale])');
  end
  
  %# Assign default window, filter type and scale.
  %# If single band edge, the first band defaults to a pass band to 
  %# create a lowpass filter.  If multiple band edges, the first band 
  %# defaults to a stop band so that the two band case defaults to a 
  %# band pass filter.  Ick.
  window = []; 
  scale = 1;
  ftype = (length(w)==1);       

  %# sort arglist, normalize any string
  for i=1:length(varargin)
    arg = varargin{i}; 
    if ischar(arg), arg=lower(arg);end
    if isempty(arg) continue; end  % octave bug---can't switch on []
    switch arg
      case {'low','stop','dc-1'}, ftype = 1;
      case {'high','pass','bandpass','dc-0'}, ftype = 0;
      case 'scale', scale = 1;
      case 'noscale', scale = 0;
      otherwise window = arg;
    end
  end

  %# build response function according to fir2 requirements
  bands = length(w)+1;
  f = zeros(1,2*bands);
  f(1) = 0; f(2*bands)=1;
  f(2:2:2*bands-1) = w;
  f(3:2:2*bands-1) = w+eps;
  m = zeros(1,2*bands);
  m(1:2:2*bands) = rem([1:bands]-(1-ftype),2);
  m(2:2:2*bands) = m(1:2:2*bands);

  %# Increment the order if the final band is a pass band.  Something
  %# about having a nyquist frequency of zero causing problems.
  if rem(n,2)==1 && m(2*bands)==1, 
    warning('n must be even for highpass and bandstop filters. Incrementing.');
    n = n+1;
    if isvector(window) && isreal(window)
      %# Extend the window using interpolation
      M = length(window);
      if M == 1,
	window = [window; window];
      elseif M < 4
	window = interp1(linspace(0,1,M),window,linspace(0,1,M+1),'linear');
      else
	window = interp1(linspace(0,1,M),window,linspace(0,1,M+1),'spline');
      end
    end
  end

  %# compute the filter
  b = fb_fir2(n, f, m, 512, 2, window);

  %# normalize filter magnitude
  if scale == 1
    %# find the middle of the first band edge
    if m(1) == 1, w_o = (f(2)-f(1))/2;
    else w_o = f(3) + (f(4)-f(3))/2;
    end

    %# compute |h(w_o)|^-1
    renorm = 1/abs(polyval(b, exp(-1i*pi*w_o)));

    %# normalize the filter
    b = renorm*b;
  end


%!demo
%! freqz(fir1(40,0.3));
%!demo
%! freqz(fir1(15,[0.2, 0.5], 'stop'));  # note the zero-crossing at 0.1
%!demo
%! freqz(fir1(15,[0.2, 0.5], 'stop', 'noscale'));

%!assert(fir1(2, .5, 'low', @hanning, 'scale'), [0 1 0]');
%!assert(fir1(2, .5, 'low', 'hanning', 'scale'), [0 1 0]');
%!assert(fir1(2, .5, 'low', hanning(3), 'scale'), [0 1 0]');

%!assert(fir1(10,.5,'noscale'), fir1(10,.5,'low','hamming','noscale'));
%!assert(fir1(10,.5,'high'), fir1(10,.5,'high','hamming','scale'));
%!assert(fir1(10,.5,'boxcar'), fir1(10,.5,'low','boxcar','scale'));
%!assert(fir1(10,.5,'hanning','scale'), fir1(10,.5,'scale','hanning','low'));
%!assert(fir1(10,.5,'haNNing','NOscale'), fir1(10,.5,'noscale','Hanning','LOW'));
%!assert(fir1(10,.5,'boxcar',[]), fir1(10,.5,'boxcar'));


%# Copyright (C) 2000 Paul Kienzle
%#
%# This program is free software; you can redistribute it and/or modify
%# it under the terms of the GNU General Public License as published by
%# the Free Software Foundation; either version 2 of the License, or
%# (at your option) any later version.
%#
%# This program is distributed in the hope that it will be useful,
%# but WITHOUT ANY WARRANTY; without even the implied warranty of
%# MERCHANTABILITY or FITNESS FOR A PARTICULAR PURPOSE.  See the
%# GNU General Public License for more details.
%#
%# You should have received a copy of the GNU General Public License
%# along with this program; If not, see <http://www.gnu.org/licenses/>.
