# Supplementary material for: HFOApp: A MATLAB Graphical User Interface for High-Frequency Oscillation Marking
Source: eNeuro. 2021 Oct 8;8(5):ENEURO.0509-20.2021. doi: 10.1523/ENEURO.0509-20.2021 (PMC8503963; doi:10.1523/ENEURO.0509-20.2021)
Supplement: Extended Data 1 — HFO App Package V1. Download Extended Data 1, ZIP file. [file enu-eN-MNT-0509-20-s02.zip › HFOApp_Package_V1/External/freetb4matlab/signal/fb_fir2.m]

%# usage: b = fir2(n, f, m [, grid_n [, ramp_n]] [, window])
%#
%# Produce an FIR filter of order n with arbitrary frequency response, 
%# returning the n+1 filter coefficients in b.  
%#
%# n: order of the filter (1 less than the length of the filter)
%# f: frequency at band edges
%#    f is a vector of nondecreasing elements in [0,1]
%#    the first element must be 0 and the last element must be 1
%#    if elements are identical, it indicates a jump in freq. response
%# m: magnitude at band edges
%#    m is a vector of length(f)
%# grid_n: length of ideal frequency response function
%#    defaults to 512, should be a power of 2 bigger than n
%# ramp_n: transition width for jumps in filter response
%#    defaults to grid_n/20; a wider ramp gives wider transitions
%#    but has better stopband characteristics.
%# window: smoothing window
%#    defaults to hamming(n+1) row vector
%#    returned filter is the same shape as the smoothing window
%#
%# To apply the filter, use the return vector b:
%#       y=filter(b,1,x);
%# Note that plot(f,m) shows target response.
%#
%# Example:
%#   f=[0, 0.3, 0.3, 0.6, 0.6, 1]; m=[0, 0, 1, 1/2, 0, 0];
%#   [h, w] = freqz(fir2(100,f,m));
%#   plot(f,m,';target response;',w/pi,abs(h),';filter response;');

%# Feb 27, 2000 PAK
%#     use ramping on any transition less than ramp_n units
%#     use 2^nextpow2(n+1) for expanded grid size if grid is too small
%# 2001-01-30 PAK
%#     set default ramp length to grid_n/20 (i.e., pi/20 radians)
%#     use interp1 to interpolate the grid points
%#     better(?) handling of 0 and pi frequency points.
%#     added some demos

function b = fb_fir2(n, f, m, grid_n, ramp_n, window)

  if nargin < 3 || nargin > 6
    error('b = fir2(n, f, m [, grid_n [, ramp_n]] [, window])');
  end

  %# verify frequency and magnitude vectors are reasonable
  t = length(f);
  if t<2 || f(1)~=0 || f(t)~=1 || any(diff(f)<0)
    error('frequency must be nondecreasing starting from 0 and ending at 1');
  end
  if t ~= length(m)
    error('frequency and magnitude vectors must be the same length');
  end

  %# find the grid spacing and ramp width
  if (nargin>4 && length(grid_n)>1) || ...
	(nargin>5 && (length(grid_n)>1 || length(ramp_n)>1))
    error('grid_n and ramp_n must be integers');
  end
  if nargin < 4, grid_n=512; end
  if nargin < 5, ramp_n=grid_n/20; end

  %# find the window parameter, or default to hamming
  w=[];
  if length(grid_n)>1, w=grid_n; grid_n=512; end
  if length(ramp_n)>1, w=ramp_n; ramp_n=grid_n/20; end
  if nargin < 6, window=w; end
  if isempty(window), window=fb_hamming(n+1); end
  if ~isreal(window), window=feval(window, n+1); end
  if length(window) ~= n+1, error('window must be of length n+1'); end

  %# make sure grid is big enough for the window
  if 2*grid_n < n+1, grid_n = 2^nextpow2(n+1); end

  %# Apply ramps to discontinuities
  if (ramp_n > 0)
    %# remember original frequency points prior to applying ramps
    basef = f(:); basem = m(:);
    
    %# separate identical frequencies, but keep the midpoint
    idx = find (diff(f) == 0);
    f(idx) = f(idx) - ramp_n/grid_n/ 2;
    f(idx+1) = f(idx+1) + ramp_n/grid_n/2;
    f = [f(:);basef(idx)]';
    
    %# make sure the grid points stay monotonic in [0,1]
    f(f<0) = 0;
    f(f>1) = 1;
    f = unique([f(:);reshape(basef(idx),[],1)]');

    %# preserve window shape even though f may have changed
    m = interp1(basef, basem, f);

    % axis([-.1 1.1 -.1 1.1])
    % plot(f,m,'-xb;ramped;',basef,basem,'-or;original;'); pause;
  end

  %# interpolate between grid points
  grid = interp1(f,m,linspace(0,1,grid_n+1)');
  % hold on; plot(linspace(0,1,grid_n+1),grid,'-+g;grid;'); hold off; pause;

  %# Transform frequency response into time response and
  %# center the response about n/2, truncating the excess
  if (rem(n,2) == 0)
    b = ifft([grid ; grid(grid_n:-1:2)]);
    mid = (n+1)/2;
    b = real ([ b([end-floor(mid)+1:end]) ; b(1:ceil(mid)) ]);
  else
    %# Add zeros to interpolate by 2, then pick the odd values below.
    b = ifft([grid ; zeros(grid_n*2,1) ;grid(grid_n:-1:2)]);
    b = 2 * real([ b([end-n+1:2:end]) ; b(2:2:(n+1))]);
  end
  %# Multiplication in the time domain is convolution in frequency,
  %# so multiply by our window now to smooth the frequency response.
  if size(window,1) > 1
    b = b .* window;
  else
    b = b' .* window;
  end


%!demo
%! f=[0, 0.3, 0.3, 0.6, 0.6, 1]; m=[0, 0, 1, 1/2, 0, 0];
%! [h, w] = freqz(fir2(100,f,m));
%! subplot(121);
%! plot(f,m,';target response;',w/pi,abs(h),';filter response;');
%! subplot(122);
%! plot(f,20*log10(m+1e-5),';target response (dB);',...
%!      w/pi,20*log10(abs(h)),';filter response (dB);');
%! oneplot;

%!demo
%! f=[0, 0.3, 0.3, 0.6, 0.6, 1]; m=[0, 0, 1, 1/2, 0, 0];
%! plot(f,20*log10(m+1e-5),';target response;');
%! hold on;
%! [h, w] = freqz(fir2(50,f,m,512,0));
%! plot(w/pi,20*log10(abs(h)),';filter response (ramp=0);');
%! [h, w] = freqz(fir2(50,f,m,512,25.6));
%! plot(w/pi,20*log10(abs(h)),';filter response (ramp=pi/20 rad);');
%! [h, w] = freqz(fir2(50,f,m,512,51.2));
%! plot(w/pi,20*log10(abs(h)),';filter response (ramp=pi/10 rad);');
%! hold off;

%!demo
%! % Classical Jakes spectrum
%! % X represents the normalized frequency from 0
%! % to the maximum Doppler frequency
%! asymptote = 2/3;
%! X = linspace(0,asymptote-0.0001,200);
%! Y = (1 - (X./asymptote).^2).^(-1/4);
%!
%! % The target frequency response is 0 after the asymptote
%! X = [X, asymptote, 1];
%! Y = [Y, 0, 0];
%!
%! title('Theoretical/Synthesized CLASS spectrum');
%! xlabel('Normalized frequency (Fs=2)');
%! ylabel('Magnitude');
%!
%! plot(X,Y,'b;Target spectrum;'); 
%! hold on;
%! [H,F]=freqz(fir2(20, X, Y));  
%! plot(F/pi,abs(H),'c;Synthesized spectrum (n=20);');
%! [H,F]=freqz(fir2(50, X, Y));  
%! plot(F/pi,abs(H),'r;Synthesized spectrum (n=50);');
%! [H,F]=freqz(fir2(200, X, Y)); 
%! plot(F/pi,abs(H),'g;Synthesized spectrum (n=200);');
%! hold off;
%! xlabel(''); ylabel(''); title('');

%# Copyright (C) 2000 Paul Kienzle
%#
%# This program is free software; you can redistribute it and/or modify
%# it under the terms of the GNU General Public License as published by
%# the Free Software Foundation; either version 2 of the License, or
%# (at your option) any later version.
%#
%# This program is distributed in the hope that it will be useful,
%# but WITHOUT ANY WARRANTY; without even the implied warranty of
%# MERCHANTABILITY or FITNESS FOR A PARTICULAR PURPOSE.  See the
%# GNU General Public License for more details.
%#
%# You should have received a copy of the GNU General Public License
%# along with this program; If not, see <http://www.gnu.org/licenses/>.
