# Supplementary material for: HFOApp: A MATLAB Graphical User Interface for High-Frequency Oscillation Marking
Source: eNeuro. 2021 Oct 8;8(5):ENEURO.0509-20.2021. doi: 10.1523/ENEURO.0509-20.2021 (PMC8503963; doi:10.1523/ENEURO.0509-20.2021)
Supplement: Extended Data 1 — HFO App Package V1. Download Extended Data 1, ZIP file. [file enu-eN-MNT-0509-20-s02.zip › HFOApp_Package_V1/External/freetb4matlab/signal/fb_hamming.m]

%# -*- texinfo -*-
%# @deftypefn {Function File} {} hamming (@var{m})
%# Return the filter coefficients of a Hamming window of length @var{m}.
%#
%# For a definition of the Hamming window, see e.g., A. V. Oppenheim &
%# R. W. Schafer, @cite{Discrete-Time Signal Processing}.
%# @end deftypefn

%# Author: AW <Andreas.Weingessel@ci.tuwien.ac.at>
%# Description: Coefficients of the Hamming window

function c = fb_hamming (m)

  if (nargin ~= 1)
    print_usage ;
  end

  if (~ (isscalar (m) && (m == round (m)) && (m > 0)))
    error ('hamming: m has to be an integer > 0');
  end

  if (m == 1)
    c = 1;
  else
    m = m - 1;
    c = 0.54 - 0.46 * cos (2 * pi * (0:m)' / m);
  end


%# Copyright (C) 1995, 1996, 1997, 1998, 2000, 2002, 2005, 2006, 2007, 2009
%#               Andreas Weingessel
%#
%# This file is part of Octave.
%#
%# Octave is free software; you can redistribute it and/or modify it
%# under the terms of the GNU General Public License as published by
%# the Free Software Foundation; either version 3 of the License, or (at
%# your option) any later version.
%#
%# Octave is distributed in the hope that it will be useful, but
%# WITHOUT ANY WARRANTY; without even the implied warranty of
%# MERCHANTABILITY or FITNESS FOR A PARTICULAR PURPOSE.  See the GNU
%# General Public License for more details.
%#
%# You should have received a copy of the GNU General Public License
%# along with Octave; see the file COPYING.  If not, see
%# <http://www.gnu.org/licenses/>.
