# Supplementary material for: HFOApp: A MATLAB Graphical User Interface for High-Frequency Oscillation Marking
Source: eNeuro. 2021 Oct 8;8(5):ENEURO.0509-20.2021. doi: 10.1523/ENEURO.0509-20.2021 (PMC8503963; doi:10.1523/ENEURO.0509-20.2021)
Supplement: Extended Data 1 — HFO App Package V1. Download Extended Data 1, ZIP file. [file enu-eN-MNT-0509-20-s02.zip › HFOApp_Package_V1/External/freetb4matlab/signal/fb_sftrans.m]

%# usage: [Sz, Sp, Sg] = sftrans(Sz, Sp, Sg, W, stop)
%#
%# Transform band edges of a generic lowpass filter (cutoff at W=1)
%# represented in splane zero-pole-gain form.  W is the edge of the
%# target filter (or edges if band pass or band stop). Stop is true for
%# high pass and band stop filters or false for low pass and band pass
%# filters. Filter edges are specified in radians, from 0 to pi (the
%# nyquist frequency).
%#
%# Theory: Given a low pass filter represented by poles and zeros in the
%# splane, you can convert it to a low pass, high pass, band pass or 
%# band stop by transforming each of the poles and zeros individually.
%# The following table summarizes the transformation:
%#
%# Transform         Zero at x                  Pole at x
%# ----------------  -------------------------  ------------------------
%# Low Pass          zero: Fc x/C               pole: Fc x/C
%# S -> C S/Fc       gain: C/Fc                 gain: Fc/C 
%# ----------------  -------------------------  ------------------------
%# High Pass         zero: Fc C/x               pole: Fc C/x
%# S -> C Fc/S       pole: 0                    zero: 0
%#                   gain: -x                   gain: -1/x
%# ----------------  -------------------------  ------------------------
%# Band Pass         zero: b 
%#        S^2+FhFl   pole: 0                    zero: 0
%# S -> C --------   gain: C/(Fh-Fl)            gain: (Fh-Fl)/C
%#        S(Fh-Fl)   b=x/C (Fh-Fl)/2            b=x/C (Fh-Fl)/2
%# ----------------  -------------------------  ------------------------
%# Band Stop         zero: b 
%#        S(Fh-Fl)   pole: 
%# S -> C --------   gain: -x                   gain: -1/x
%#        S^2+FhFl   b=C/x (Fh-Fl)/2            b=C/x (Fh-Fl)/2
%# ----------------  -------------------------  ------------------------
%# Bilinear          zero: (2+xT)/(2-xT)        pole: (2+xT)/(2-xT)
%#      2 z-1        pole: -1                   zero: -1
%# S -> - ---        gain: (2-xT)/T             gain: (2-xT)/T
%#      T z+1
%# ----------------  -------------------------  ------------------------
%#
%# where C is the cutoff frequency of the initial lowpass filter, Fc is
%# the edge of the target low/high pass filter and [Fl,Fh] are the edges
%# of the target band pass/stop filter.  With abundant tedious algebra,
%# you can derive the above formulae yourself by substituting the
%# transform for S into H(S)=S-x for a zero at x or H(S)=1/(S-x) for a
%# pole at x, and converting the result into the form:
%#
%#    H(S)=g prod(S-Xi)/prod(S-Xj)
%#
%# The transforms are from the references.  The actual pole-zero-gain
%# changes I derived myself.
%#
%# Please note that a pole and a zero at the same place exactly cancel.
%# This is significant for High Pass, Band Pass and Band Stop filters
%# which create numerous extra poles and zeros, most of which cancel.
%# Those which do not cancel have a 'fill-in' effect, extending the 
%# shorter of the sets to have the same number of as the longer of the
%# sets of poles and zeros (or at least split the difference in the case
%# of the band pass filter).  There may be other opportunistic
%# cancellations but I will not check for them.
%#
%# Also note that any pole on the unit circle or beyond will result in
%# an unstable filter.  Because of cancellation, this will only happen
%# if the number of poles is smaller than the number of zeros and the
%# filter is high pass or band pass.  The analytic design methods all
%# yield more poles than zeros, so this will not be a problem.
%# 
%# References: 
%#
%# Proakis & Manolakis (1992). Digital Signal Processing. New York:
%# Macmillan Publishing Company.

%# Author: Paul Kienzle <pkienzle@users.sf.net>

%# 2000-03-01 pkienzle@kienzle.powernet.co.uk
%#       leave transformed Sg as a complex value since cheby2 blows up
%#       otherwise (but only for odd-order low-pass filters).  bilinear
%#       will return Zg as real, so there is no visible change to the
%#       user of the IIR filter design functions.
%# 2001-03-09 pkienzle@kienzle.powernet.co.uk
%#       return real Sg; don't know what to do for imaginary filters
function [Sz, Sp, Sg] = sftrans(Sz, Sp, Sg, W, stop)

  if (nargin ~= 5)
    error('[Sz, Sp, Sg] = sftrans(Sz, Sp, Sg, W, stop)');
  end;

  C = 1;
  p = length(Sp);
  z = length(Sz);
  if z > p || p == 0
    error('sftrans: must have at least as many poles as zeros in s-plane');
  end

  if length(W)==2
    Fl = W(1);
    Fh = W(2);
    if stop
%# ----------------  -------------------------  ------------------------
%# Band Stop         zero: b 
%#        S(Fh-Fl)   pole: 
%# S -> C --------   gain: -x                   gain: -1/x
%#        S^2+FhFl   b=C/x (Fh-Fl)/2            b=C/x (Fh-Fl)/2
%# ----------------  -------------------------  ------------------------
      if (isempty(Sz))
	Sg = Sg * real (1./ prod(-Sp));
      elseif (isempty(Sp))
	Sg = Sg * real(prod(-Sz));
      else
	Sg = Sg * real(prod(-Sz)/prod(-Sp));
      end
      b = (C*(Fh-Fl)/2)./Sp;
      Sp = [b+sqrt(b.^2-Fh*Fl), b-sqrt(b.^2-Fh*Fl)];
      extend = [sqrt(-Fh*Fl), -sqrt(-Fh*Fl)];
      if isempty(Sz)
	Sz = [extend(1+rem([1:2*p],2))];
      else
      	b = (C*(Fh-Fl)/2)./Sz;
      	Sz = [b+sqrt(b.^2-Fh*Fl), b-sqrt(b.^2-Fh*Fl)];
	if (p > z)
	  Sz = [Sz, extend(1+rem([1:2*(p-z)],2))];
	end
      end
    else
%# ----------------  -------------------------  ------------------------
%# Band Pass         zero: b 
%#        S^2+FhFl   pole: 0                    zero: 0
%# S -> C --------   gain: C/(Fh-Fl)            gain: (Fh-Fl)/C
%#        S(Fh-Fl)   b=x/C (Fh-Fl)/2            b=x/C (Fh-Fl)/2
%# ----------------  -------------------------  ------------------------
      Sg = Sg * (C/(Fh-Fl))^(z-p);
      b = Sp*((Fh-Fl)/(2*C));
      Sp = [b+sqrt(b.^2-Fh*Fl), b-sqrt(b.^2-Fh*Fl)];
      if isempty(Sz)
	Sz = zeros(1,p);
      else
      	b = Sz*((Fh-Fl)/(2*C));
      	Sz = [b+sqrt(b.^2-Fh*Fl), b-sqrt(b.^2-Fh*Fl)];
 	if (p>z)
	  Sz = [Sz, zeros(1, (p-z))];
	end
      end
    end
  else
    Fc = W;
    if stop
%# ----------------  -------------------------  ------------------------
%# High Pass         zero: Fc C/x               pole: Fc C/x
%# S -> C Fc/S       pole: 0                    zero: 0
%#                   gain: -x                   gain: -1/x
%# ----------------  -------------------------  ------------------------
      if (isempty(Sz))
	Sg = Sg * real (1./ prod(-Sp));
      elseif (isempty(Sp))
	Sg = Sg * real(prod(-Sz));
      else
	Sg = Sg * real(prod(-Sz)/prod(-Sp));
      end
      Sp = C * Fc ./ Sp;
      if isempty(Sz)
	Sz = zeros(1,p);
      else
      	Sz = [C * Fc ./ Sz];
  	if (p > z)
	  Sz = [Sz, zeros(1,p-z)];
	end
      end
    else
%# ----------------  -------------------------  ------------------------
%# Low Pass          zero: Fc x/C               pole: Fc x/C
%# S -> C S/Fc       gain: C/Fc                 gain: Fc/C 
%# ----------------  -------------------------  ------------------------
      Sg = Sg * (C/Fc)^(z-p);
      Sp = Fc * Sp / C;
      Sz = Fc * Sz / C;
    end
  end

      

%# Copyright (C) 1999 Paul Kienzle
%#
%# This program is free software; you can redistribute it and/or modify
%# it under the terms of the GNU General Public License as published by
%# the Free Software Foundation; either version 2 of the License, or
%# (at your option) any later version.
%#
%# This program is distributed in the hope that it will be useful,
%# but WITHOUT ANY WARRANTY; without even the implied warranty of
%# MERCHANTABILITY or FITNESS FOR A PARTICULAR PURPOSE.  See the
%# GNU General Public License for more details.
%#
%# You should have received a copy of the GNU General Public License
%# along with this program; If not, see <http://www.gnu.org/licenses/>.
