# Supplementary material for: HFOApp: A MATLAB Graphical User Interface for High-Frequency Oscillation Marking
Source: eNeuro. 2021 Oct 8;8(5):ENEURO.0509-20.2021. doi: 10.1523/ENEURO.0509-20.2021 (PMC8503963; doi:10.1523/ENEURO.0509-20.2021)
Supplement: Extended Data 1 — HFO App Package V1. Download Extended Data 1, ZIP file. [file enu-eN-MNT-0509-20-s02.zip › HFOApp_Package_V1/External/freetb4matlab/signal/fd_filtfilt.m]

%# usage: y = filtfilt(b, a, x)
%#
%# Forward and reverse filter the signal. This corrects for phase
%# distortion introduced by a one-pass filter, though it does square the
%# magnitude response in the process. That's the theory at least.  In
%# practice the phase correction is not perfect, and magnitude response
%# is distorted, particularly in the stop band.
%###
%# Example
%#    [b, a]=butter(3, 0.1);                   % 10 Hz low-pass filter
%#    t = 0:0.01:1.0;                         % 1 second sample
%#    x=sin(2*pi*t*2.3)+0.25*randn(size(t));  % 2.3 Hz sinusoid+noise
%#    y = filtfilt(b,a,x); z = filter(b,a,x); % apply filter
%#    plot(t,x,';data;',t,y,';filtfilt;',t,z,';filter;')

%# Changelog:
%# 2000 02 pkienzle@kienzle.powernet.co.uk
%#      - pad with zeros to load up the state vector on filter reverse.
%#      - add example
%# 2007 12 pot@gnu.org
%#	    - use filtic to compute initial and final states
%#      - work for multiple columns as well
%# 2008 12 lciti@essex.ac.uk
%#      - fixed instability issues with IIR filters and noisy inputs
%#	    - initial states computed according to Likhterov & Kopeika, 2003
%#      - use of a 'reflection method' to reduce end effects
%#      - added some basic tests

%# TODO:  (pkienzle) My version seems to have similar quality to matlab,
%#	but both are pretty bad.  They do remove gross lag errors, though.


function y = fd_filtfilt(b, a, x)
  if (nargin ~= 3)
    error('y=filtfilt(b,a,x)');
  end
  rotate = (size(x,1)==1);
  if rotate,			% a row vector
    x = x(:);			% make it a column vector
  end
  
  lx = size(x,1);
  a = a(:).';
  b = b(:).';
  lb = length(b);
  la = length(a);
  n = max(lb, la);
  lrefl = 3 * (n - 1);
  if la < n, a(n) = 0; end
  if lb < n, b(n) = 0; end

  %# Compute a the initial state taking inspiration from
  %# Likhterov & Kopeika, 2003. 'Hardware-efficient technique for
  %#     minimizing startup transients in Direct Form II digital filters'
  kdc = sum(b) / sum(a);
  if (abs(kdc) < inf) % neither NaN nor +/- Inf
    si = fliplr(cumsum(fliplr(b - kdc * a)));
  else
    si = zeros(size(a)); % fall back to zero initialization
  end
  si(1) = [];

  for (c = 1:size(x,2))	% filter all columns, one by one
    v = [2*x(1,c)-x((lrefl+1):-1:2,c); x(:,c);
             2*x(end,c)-x((end-1):-1:end-lrefl,c)]; % a column vector

    %# Do forward and reverse filtering
    v = filter(b,a,v,si*v(1));		       % forward filter
    v = flipud(filter(b,a,flipud(v),si*v(end))); % reverse filter
    y(:,c) = v((lrefl+1):(lx+lrefl));
  end

  if (rotate)			% x was a row vector
    y = rot90(y);		% rotate it back
  end


%!error filtfilt ();

%!error filtfilt (1, 2, 3, 4);

%!test
%! randn('state',0);
%! r = randn(1,200);
%! [b,a] = butter(10, [.2, .25]);
%! yfb = filtfilt(b, a, r);
%! assert (size(r), size(yfb));
%! assert (mean(abs(yfb)) < 1e3);
%! assert (mean(abs(yfb)) < mean(abs(r)));
%! ybf = fliplr(filtfilt(b, a, fliplr(r)));
%! assert (mean(abs(ybf)) < 1e3);
%! assert (mean(abs(ybf)) < mean(abs(r)));

%!test
%! randn('state',0);
%! r = randn(1,1000);
%! s = 10 * sin(pi * 4e-2 * (1:length(r)));
%! [b,a] = cheby1(2, .5, [4e-4 8e-2]);
%! y = filtfilt(b, a, r+s);
%! assert (size(r), size(y));
%! assert (mean(abs(y)) < 1e3);
%! assert (corrcoef(s(250:750), y(250:750)) > .95)
%! [b,a] = butter(2, [4e-4 8e-2]);
%! yb = filtfilt(b, a, r+s);
%! assert (mean(abs(yb)) < 1e3);
%! assert (corrcoef(y, yb) > .99)

%!test
%! randn('state',0);
%! r = randn(1,1000);
%! s = 10 * sin(pi * 4e-2 * (1:length(r)));
%! [b,a] = butter(2, [4e-4 8e-2]);
%! y = filtfilt(b, a, [r.' s.']);
%! yr = filtfilt(b, a, r);
%! ys = filtfilt(b, a, s);
%! assert (y, [yr.' ys.']);
%! y2 = filtfilt(b.', a.', [r.' s.']);
%! assert (y, y2);


%# Copyright (C) 1999 Paul Kienzle
%# Copyright (C) 2007 Francesco Potortì
%# Copyright (C) 2008 Luca Citi
%#
%# This program is free software; you can redistribute it and/or modify
%# it under the terms of the GNU General Public License as published by
%# the Free Software Foundation; either version 2 of the License, or
%# (at your option) any later version.
%#
%# This program is distributed in the hope that it will be useful,
%# but WITHOUT ANY WARRANTY; without even the implied warranty of
%# MERCHANTABILITY or FITNESS FOR A PARTICULAR PURPOSE.  See the
%# GNU General Public License for more details.
%#
%# You should have received a copy of the GNU General Public License
%# along with this program; If not, see <http://www.gnu.org/licenses/>.
