# Supplementary material for: HFOApp: A MATLAB Graphical User Interface for High-Frequency Oscillation Marking
Source: eNeuro. 2021 Oct 8;8(5):ENEURO.0509-20.2021. doi: 10.1523/ENEURO.0509-20.2021 (PMC8503963; doi:10.1523/ENEURO.0509-20.2021)
Supplement: Extended Data 1 — HFO App Package V1. Download Extended Data 1, ZIP file. [file enu-eN-MNT-0509-20-s02.zip › HFOApp_Package_V1/External/freetb4matlab/statistics/discrete_cdf.m]

%# -*- texinfo -*-
%# @deftypefn {Function File} {} discrete_cdf (@var{x}, @var{v}, @var{p})
%# For each element of @var{x}, compute the cumulative distribution
%# function (CDF) at @var{x} of a univariate discrete distribution which
%# assumes the values in @var{v} with probabilities @var{p}.
%# @end deftypefn

function cdf = discrete_cdf (x, v, p)

  if (nargin ~= 3)
    print_usage ;
  end

  sz = size (x);

  if (~ isvector (v))
    error ('discrete_cdf: v must be a vector');
  elseif (~ isvector (p) || (length (p) ~= length (v)))
    error ('discrete_cdf: p must be a vector with length (v) elements');
  elseif (~ (all (p >= 0) && any (p)))
    error ('discrete_cdf: p must be a nonzero, nonnegative vector');
  end

  n = numel (x);
  m = length (v);
  x = reshape (x, n, 1);
  v = reshape (v, 1, m);
  p = reshape (p / sum (p), m, 1);

  cdf = NaN (sz);
  k = find (~isnan (x));
  if (any (k))
    n = length (k);
    [vs, vi] = sort (v);
    tmp = [0 ; cumsum(p(vi))];
    cdf(k) = tmp(lookup (vs, x(k)) + 1);
%     cdf(k) = tmp(find(vs, x(k)) + 1);    
  end


%# Copyright (C) 2010 David Bateman
%#
%# This file is part of Octave.
%#
%# Octave is free software; you can redistribute it and/or modify it
%# under the terms of the GNU General Public License as published by
%# the Free Software Foundation; either version 3 of the License, or (at
%# your option) any later version.
%#
%# Octave is distributed in the hope that it will be useful, but
%# WITHOUT ANY WARRANTY; without even the implied warranty of
%# MERCHANTABILITY or FITNESS FOR A PARTICULAR PURPOSE.  See the GNU
%# General Public License for more details.
%#
%# You should have received a copy of the GNU General Public License
%# along with Octave; see the file COPYING.  If not, see
%# <http://www.gnu.org/licenses/>.
