# Supplementary material for: HFOApp: A MATLAB Graphical User Interface for High-Frequency Oscillation Marking
Source: eNeuro. 2021 Oct 8;8(5):ENEURO.0509-20.2021. doi: 10.1523/ENEURO.0509-20.2021 (PMC8503963; doi:10.1523/ENEURO.0509-20.2021)
Supplement: Extended Data 1 — HFO App Package V1. Download Extended Data 1, ZIP file. [file enu-eN-MNT-0509-20-s02.zip › HFOApp_Package_V1/External/freetb4matlab/statistics/fb_gamcdf.m]

%# -*- texinfo -*-
%# @deftypefn {Function File} {} gamcdf (@var{x}, @var{a}, @var{b})
%# For each element of @var{x}, compute the cumulative distribution
%# function (CDF) at @var{x} of the Gamma distribution with parameters
%# @var{a} and @var{b}.
%# @seealso{gamma, gammaln, gammainc, gampdf, gaminv, gamrnd}
%# @end deftypefn

%# Author: TT <Teresa.Twaroch@ci.tuwien.ac.at>
%# Description: CDF of the Gamma distribution

function cdf = fb_gamcdf (x, a, b)

  if (nargin ~= 3)
    print_usage ;
  end

  if (~isscalar (a) || ~isscalar(b))
    [retval, x, a, b] = common_size (x, a, b);
    if (retval > 0)
      error ('gamcdf: x, a and b must be of common size or scalars');
    end
  end

  sz = size (x);
  cdf = zeros (sz);

  k = find (~(a > 0) | ~(b > 0) | isnan (x));
  if (any (k))
    cdf (k) = NaN;
  end

  k = find ((x > 0) & (a > 0) & (b > 0));
  if (any (k))
    if (isscalar (a) && isscalar(b))
      cdf (k) = gammainc (x(k) ./ b, a);
    else
      cdf (k) = gammainc (x(k) ./ b(k), a(k));
    end
  end


%# Copyright (C) 1995, 1996, 1997, 2005, 2006, 2007 Kurt Hornik
%#
%# This file is part of Octave.
%#
%# Octave is free software; you can redistribute it and/or modify it
%# under the terms of the GNU General Public License as published by
%# the Free Software Foundation; either version 3 of the License, or (at
%# your option) any later version.
%#
%# Octave is distributed in the hope that it will be useful, but
%# WITHOUT ANY WARRANTY; without even the implied warranty of
%# MERCHANTABILITY or FITNESS FOR A PARTICULAR PURPOSE.  See the GNU
%# General Public License for more details.
%#
%# You should have received a copy of the GNU General Public License
%# along with Octave; see the file COPYING.  If not, see
%# <http://www.gnu.org/licenses/>.
