# Supplementary material for: HFOApp: A MATLAB Graphical User Interface for High-Frequency Oscillation Marking
Source: eNeuro. 2021 Oct 8;8(5):ENEURO.0509-20.2021. doi: 10.1523/ENEURO.0509-20.2021 (PMC8503963; doi:10.1523/ENEURO.0509-20.2021)
Supplement: Extended Data 1 — HFO App Package V1. Download Extended Data 1, ZIP file. [file enu-eN-MNT-0509-20-s02.zip › HFOApp_Package_V1/External/freetb4matlab/statistics/fb_gamlike.m]

%# -*- texinfo -*-
%# @deftypefn {Function File} {} X = gamlike ([@var{A} @var{B}], @var{R})
%# Calculates the negative log-likelihood function for the Gamma
%# distribution over vector R, with the given parameters A and B.
%# @seealso{gampdf, gaminv, gamrnd, gamfit}
%# @end deftypefn

%# Written by Martijn van Oosterhout <kleptog@svana.org> (Nov 2006)
%# This code is public domain

function res = fb_gamlike(P,K)

a=P(1);
b=P(2);

res = -sum( log( fb_gampdf(K, a, b) ) );

 	  	 
