# Supplementary material for: HFOApp: A MATLAB Graphical User Interface for High-Frequency Oscillation Marking
Source: eNeuro. 2021 Oct 8;8(5):ENEURO.0509-20.2021. doi: 10.1523/ENEURO.0509-20.2021 (PMC8503963; doi:10.1523/ENEURO.0509-20.2021)
Supplement: Extended Data 1 — HFO App Package V1. Download Extended Data 1, ZIP file. [file enu-eN-MNT-0509-20-s02.zip › HFOApp_Package_V1/External/wafo/@wdata/setsamplinginfo.m]

function  self = setsamplinginfo(self)
%SETSAMPLINGINFO Set argmax, argmin and samplerate
%
% CALL: self = setsamplinginfo(self)

Nf = numel(self);
if Nf>1
  for ix = 1:Nf
    self(ix) = setsamplinginfo(self(ix));
  end
else
try
  if iscell(self.args) % Multidimensional data
    argsz = size(self.args{1});
    isVectorArguments = (sum(argsz>1) <= 1);
    if isVectorArguments
      self.argMax = cellfun(@max,self.args);
      self.argMin = cellfun(@min,self.args);
      dX = cellfun(@diff,self.args,'UniformOutput',false);
      [dX{cellfun(@isempty,dX)}] = deal(nan);
      self.sampleRate = cellfun(@min,dX);
    else
      Nargs       = length(self.args);
      self.argMax        = zeros(1,Nargs);
      self.argMin        = zeros(1,Nargs);
      self.sampleRate  = zeros(1,Nargs);
      if Nargs>3
        % Args assumed made from ndgrid.
        dims = 1:Nargs;
      else
        % Args assumed made from meshgrid.
        dims = [2 1,3:Nargs];
      end
      for ix = 1:Nargs
        self.argMax(ix) = max(self.args{ix}(:));
        self.argMin(ix) = min(self.args{ix}(:));
        dX = diff(self.args{ix},1,dims(ix));
        self.sampleRate(ix) = min(dX(:));
      end
    end    
%     switch length(self.args);
%       case 2,
%         self.type = data_2d;
%       case 3,
%         self.type = data_3d;
%       otherwise 
%         self.type = data_nd;
%     end
  else % One dimensional data
    self.argMax = max(self.args);
    self.argMin = min(self.args);
    self.sampleRate = min(diff(self.args));
    if isempty(self.sampleRate)
      self.sampleRate = nan;
    end
%     self.type = data_1d;
  end
catch
  % do nothing
end
end


if nargout<1
  % Write the newly updated data object back to the calling program
  assignin('caller',inputname(1), self);
end
