# Supplementary material for: HFOApp: A MATLAB Graphical User Interface for High-Frequency Oscillation Marking
Source: eNeuro. 2021 Oct 8;8(5):ENEURO.0509-20.2021. doi: 10.1523/ENEURO.0509-20.2021 (PMC8503963; doi:10.1523/ENEURO.0509-20.2021)
Supplement: Extended Data 1 — HFO App Package V1. Download Extended Data 1, ZIP file. [file enu-eN-MNT-0509-20-s02.zip › HFOApp_Package_V1/External/wafo/COPYRIGHTS]

% The following files of WAFO are distributed under the
% GNU LESSER GENERAL PUBLIC LICENSE; either version 3 of the License, or
% (at your option) any later version.


Graphutil
---------
black
clevels
cltext
epcolor
fcolorbar
figXXXX.m
plotfill
tallibing
tallibing3
vtkwrite
wafostamp
mayaplot

Kdetools
--------
bincount
chi2gof
chi2gof2
deriv
deriv2
evalpdf
fftce
gridcount
hXXX.m
kde.m
kde1dgui.m
kde2dgui.m
kdebin
kdedemo1
kdedemo2
kdefun
kdeoptset
kernelstats
mkernel
mkernel2
mkernelrnd
pdfstat
qlevels
qlevels2
sample
ssample
vsph


Misc
----
betaloge
binom.m
ccquad
comnsize
findpeaks.m
genchol
geth1line
getshipchar.m
gravity.m
hypgf.m
iscomnsize
ismatlab
isoctave
levels
loaddata
mkcontents.m
parent.m
parseoptions.m
simpson.m
sinc.m
smooth.m
wafoversion.m
wdensity.m
where


Multidim
------
dat2dspec.m
dspec2spreading.m
sensortypeid.m
sensortype.m
specoptset.m
testmeasurements

bfsspec.m
getcrosspectra.m
hwestimate.m
imlm.m
memfun.m
mlm.m 
normspfn.m

Numdifftols
----------
derivest.m
directionaldiff.m
gradest
hessdiag
hessian
jacobianest

Onedim
------
bartlett
covplot.m
dat2cor
dat2cov
dat2crossind
dat2crossind.m
dat2lc.m
dat2spec
dat2spec2
dat2steep.m
dat2tc.m
dat2tp.m
dat2wa.m
detrendma.m
ecross.m
findcross.m
findextrema.m
findoutliers
findrfc.m
hanning
hs2sign.m
lcplot.m
mm2lc.m
parzen
plotlc
reconstruct.m
spwaveplot.m
waveplot.m
vc2sign.m

Polyutil
--------
poly2hstr
poly2str
polyadd
polydiv
polyint
polyishft
polymul
polynder
polynint
polypow
polyreloc
polyrescl
polyshft
polysub
polytrim


Simtools
--------
cov2csdat.m
cov2sdat.m
disufq.m
disufq.c
duffsim.m
lc2sdat.m
seamovie.m
seasim.m
spec2linspec.m
spec2nlsdat.m
spec2sdat.m

Spec
----
bretschneider.m
cov2spec.m
covinterp
createcov
createspec
demospec
dspec2char
getjonswappeakedness.m
getjonswapseastate.m
jonswap.m
k2w
lagtype
mccormick.m
mkbretschneider.m
mkdspec
mkjonswap.m
mkochihubble.m
mkspreading.m
mktmaspec.m
mktorsethaugen.m
normpsec
ochihubble.m
ohspec.m
ohspec3.m
oscspec.m
phi1.m
plotspec
pmspec.m
rotspec
scalespec
spec2bw
spec2char
spec2cov
spec2cov2
spec2dt
spec2mom
spec2spec
specinterp
specnorm
specplot
specscale
spreading
tmaspec.m
torsethaugen.m
ttspec
w2k.m
wallop.m

Statistics
----------
alias
mombeta
invbeta
cdfbeta

ciproflog
comnsize
pdfbeta
fitbeta
loglike
logps
invnorm
edf
edfcnd
plotedf
plotedfcnd
proflog

Wavemodels
----------
b04jpdf.m
b04jpdf2.m
b04pdf.m
b04pdf2.m
bmr00pdf.m
bmr00pdf2.m
braylpdf.m
cav76pdf.m
jhspdf.m
jhspdf2.m
jhsnlpdf.m
jhsnlpdf2.m
jhvnlpdf.m
jhvnlpdf2.m
jhvpdf.m
jhvpdf2.m
lh83pdf.m
ltwcpdf.m
mk87pdf.m
mk87pdf2.m
ochi98pdf.m
ohhpdf.m
ohhspdf.m
ohhspdf2.m
ohhsspdf.m
ohhsspdf2.m
ohhvpdf.m
tay81pdf.m
tay90pdf.m
thpdf.m
thsnlpdf2.m
thsnlpdf.m
thspdf.m
thspdf2.m
thsspdf.m
thsspdf2.m
thvpdf.m
thvpdf2.m
trraylpdf.m


b04cdf.m
b04jcdf.m
bmr00cdf.m
braylcdf.m
jhscdf.m
jhsnlcdf.m
jhvcdf.m
jhvnlcdf.m
mk87cdf.m
ochi98cdf.m 
ohhcdf.m
ohhscdf.m
ohhsscdf.m
tay81cdf.m
tay90cdf.m
thcdf.m
thscdf.m
thsnlcdf.m
thsscdf.m
thvcdf.m

mk87rnd.m
braylfit.m
ochi98fit.m
 
jhwparfun.m
jhnlwparfun.m
ohhgparfun.m
tay81fun.m
tay90fun.m
thgparfun.m
thwparfun.m
