# Supplementary material for: HFOApp: A MATLAB Graphical User Interface for High-Frequency Oscillation Marking
Source: eNeuro. 2021 Oct 8;8(5):ENEURO.0509-20.2021. doi: 10.1523/ENEURO.0509-20.2021 (PMC8503963; doi:10.1523/ENEURO.0509-20.2021)
Supplement: Extended Data 1 — HFO App Package V1. Download Extended Data 1, ZIP file. [file enu-eN-MNT-0509-20-s02.zip › HFOApp_Package_V1/External/wafo/wafolicence.m]

% This file is part of WAFO.
% 
%  WAFO is free software; you can redistribute it and/or modify
%  it under the terms of the GNU General Public License as published by
%  the Free Software Foundation; either version 3 of the License, or
%  (at your option) any later version.
% 
%  WAFO is distributed in the hope that it will be useful,
%  but WITHOUT ANY WARRANTY; without even the implied warranty of
%  MERCHANTABILITY or FITNESS FOR A PARTICULAR PURPOSE.  See the
%  GNU General Public License for more details.
% 
% The terms of the GNU General Public license are in a file called COPYING 
% which you should have received with this software. If you have not 
% received a copy of this file, you can obtain one via WWW at 
%
%   <http://www.gnu.org/licenses/> 
%
% or by writing to:
% 
%    The Free Software Foundation, Inc.,
%    51 Franklin Street, Fifth Floor, Boston, MA 02110-1301, USA.
% 
% A small number of files (listed in COPYRIGHTS) are distributed under the
% GNU LESSER GENERAL PUBLIC LICENSE; either version 3 of the License, or
% (at your option) any later version.
%
% The terms of the GNU Lesser General Public license are in a file called COPYING.LESSER 
% which you should have received with this software. If you have not 
% received a copy of this file, you can obtain one via the same address
% as given above.
%
